# 1 **Characterization and visualization of global metabolomic responses** 2 **of *Brachypodium distachyon* to environmental changes**

3 Elizabeth H. Mahood<sup>1</sup>, Alexandra A. Bennett<sup>1,2</sup>, Karyn Komatsu<sup>3</sup>, Lars H. Kruse<sup>1,4</sup>, Vincent Lau<sup>3</sup>,  
4 Maryam Rahmati Ishka<sup>1,5</sup>, Yulin Jiang<sup>6</sup>, Armando Bravo<sup>5,7</sup>, Benjamin P. Bowen<sup>8,9</sup>, Katherine  
5 Louie<sup>8,9</sup>, Maria J. Harrison<sup>5</sup>, Nicholas J. Provart<sup>3</sup>, Olena K. Vatamaniuk<sup>6</sup>, Gaurav D. Moghe<sup>1</sup>

## 6 **Affiliations:**

7 1 Plant Biology Section, School of Integrative Plant Science, Cornell University, Ithaca, NY,  
8 USA

9 2 Present address: Institute of Analytical Chemistry, Department of Chemistry, Universität Für  
10 Bodenkultur Wien, Vienna, Austria

11 3 Department of Cell and Systems Biology, University of Toronto, Canada

12 4 Present address: Michael Smith Laboratories, University of British Columbia, Vancouver,  
13 Canada

14 5 Boyce Thompson Institute, Ithaca, NY, USA

15 6 Soil and Crop Sciences Section, School of Integrative Plant Science, Cornell University,  
16 Ithaca, NY, USA

17 7 Present address: Donald Danforth Plant Science Center, Olivette, MO, USA

18 8 Environmental Genomics and Systems Biology Division, Lawrence Berkeley National  
19 Laboratory, Berkeley, CA, USA

20 9 Department of Energy Joint Genome Institute, Lawrence Berkeley National Laboratory,  
21 Berkeley, CA, USA

22 Corresponding author: [gdm67@cornell.edu](mailto:gdm67@cornell.edu)

## 23 **ORCID:**

24 EHM: 0000-0002-7087-6580

25 AAB: 0000-0002-5403-0382

26 LHK: 0000-0002-0449-092X

27 MRI: 0000-0002-5447-643X

28 YJ: 0000-0002-2518-9570

29 AB: 0000-0003-3869-045X

30 MJH: 0000-0001-8716-1875

31 NJP: 0000-0001-5551-7232

32 OKV: 0000-0003-2713-3797

33 GDM: 0000-0002-8761-064X

34 **Keywords:** Computational biology, Metabolomics, Mass spectrometry, Abiotic stress,  
35 Mycorrhizal symbiosis, Brachypodium

36  
37  
38  
39  
40  
41  
42  
43

## 44 **Abstract**

45 Plant responses to environmental change are mediated via changes in cellular  
46 metabolomes. However, <5% of signals obtained from tandem liquid chromatography  
47 mass spectrometry (LC-MS/MS) can be identified, limiting our understanding of how  
48 different metabolite classes change under biotic/abiotic stress. To address this challenge,  
49 we performed untargeted LC-MS/MS of leaves, roots and other organs of *Brachypodium*  
50 *distachyon*, a model Poaceae species, under 17 different organ-condition combinations,  
51 including copper deficiency, heat stress, low phosphate and arbuscular mycorrhizal  
52 symbiosis (AMS). We used a combination of information theory-based metrics and  
53 machine learning-based identification of metabolite structural classes to assess  
54 metabolomic changes. Both leaf and root metabolomes were significantly affected by the  
55 growth medium. Leaf metabolomes were more diverse than root metabolomes, but the  
56 latter were more specialized and more responsive to environmental change. We also  
57 found that one week of copper deficiency shielded the root metabolome, but not the leaf  
58 metabolome, from perturbation due to heat stress. Using a recently published deep  
59 learning based method for metabolite class predictions, we analyzed the responsiveness  
60 of each metabolite class to environmental change, which revealed significant  
61 perturbations of various lipid classes and phenylpropanoids such as cinnamic acids and  
62 flavonoids. Co-accumulation analysis further identified condition-specific metabolic  
63 biomarkers. Finally, to make these results publicly accessible, we developed a novel  
64 visualization platform on the Bioanalytical Resource website, where significantly  
65 perturbed metabolic classes can be readily visualized. Overall, our study illustrates how  
66 emerging chemoinformatic methods can be applied to reveal novel insights into the  
67 dynamic plant metabolome and plant stress adaptation.

68

69

## 70 **Introduction**

71

72 The central dogma of molecular biology extends from genes to transcripts to  
73 proteins. These proteins, however, exert an effect on the phenotype eventually through  
74 altering metabolites. Agronomically important traits such as yield, nutritional quality, flavor  
75 characteristics and stress response are all controlled by underlying metabolic pathways.  
76 A revolution in sequencing over the past decade has provided unparalleled insights into  
77 the transcriptomic and epigenomic perturbations due to genotypic and environmental  
78 changes, yet the global metabolome largely remains a black box, primarily due to our  
79 inability to identify compounds from metabolomics data (Chaleckis et al., 2019; Salem et  
80 al., 2020). It is estimated that over a million compounds are produced across the plant  
81 kingdom (Afendi et al., 2012), with individual plants producing thousands of metabolites  
82 (Fernie, 2007). However, <5% of these signals can be annotated using spectral matching  
83 (da Silva and Dorrestein, 2015). Thus, patterns of global metabolomic changes still  
84 remain unknown despite the importance metabolites have to plant fitness and human  
85 society.

86 To assess metabolomic changes due to genetic variation, developmental  
87 progression and environmental changes, gas chromatography mass spectrometry (GC-  
88 MS) and liquid chromatography mass spectrometry (LC-MS) remain the workhorse  
89 approaches, with LC-MS typically detecting a much broader set of the metabolome.  
90 Although diverse algorithmic innovations have aided in metabolome assessments  
91 (Brouard et al., 2016; Tsugawa et al., 2016; Schymanski et al., 2017; Dührkop et al.,  
92 2019), LC-MS peaks are primarily annotated using MS/MS spectral matching with entries  
93 from public databases (Horai et al., 2010; Wang et al., 2016; Guijas et al., 2018). While  
94 correct predictions are indeed obtained in this manner, plant-derived compounds are  
95 underrepresented in public databases (Fukushima and Kusano, 2013; Shahaf et al.,  
96 2016), which potentially produces false positives in the limited numbers of compounds  
97 identified. Partly due to this limitation, many LC-MS based studies are targeted or semi-  
98 targeted, and end up analyzing a small but identifiable portion of the metabolome (Itkin et  
99 al., 2013; Okazaki et al., 2013; Bromke et al., 2015; Tohge et al., 2016; Šimura et al.,  
100 2018). This strategy produces robust insights, but global shifts in the metabolome and  
101 their genetic drivers cannot be assessed via targeted studies. Identifying such patterns  
102 can provide novel insights into metabolic plasticity and plant responses to stress  
103 conditions, which are important for addressing challenges of agricultural productivity due  
104 to climate change, overpopulation and degrading soil quality.

105 In recent years, two important resources have emerged for the analysis of global  
106 untargeted tandem LC-MS (LC-MS/MS) data. Firstly, the machine learning (ML) based  
107 tool CANOPUS (Dührkop et al., 2021) enables prediction of metabolite structural classes  
108 based on the MS/MS spectrum, providing novel insights into the metabolome  
109 composition. For example, even if specific compounds are not identified, recognizing that  
110 “flavonoids” increase in abundance under UV stress provides significant biological  
111 insights into the plant’s stress response. Secondly, independent of compound annotation,  
112 approaches adapted from information theory can inform about the gross and/or specific  
113 shifts in plant metabolomes (Li et al., 2020; Zu et al., 2020). In this study, we combine  
114 these two approaches to illuminate global changes in plant metabolomes under different  
115 conditions.

116 Specifically, we assessed the metabolome of *Brachypodium distachyon*  
117 (*Brachypodium*) under different conditions (**Fig. 1**). *Brachypodium* is a model C3 grass  
118 species in the Poaceae family that shared a common ancestor with rice (*Oryza sativa*)  
119 ~50 million years ago and Triticeae (wheat, barley) ~35 million years ago (Charles et al.,  
120 2009). The short stature of *Brachypodium* and its fast growth cycle make the species a  
121 convenient model for understanding not only Poaceae biology but also for biofuel  
122 research (Brkljacic et al., 2011; Douché et al., 2013; Marriott et al., 2014; Le Bris et al.,  
123 2019). The main goals of this study were to: (i) assess *Brachypodium* metabolome  
124 reconfigurations across different organs and a breadth of environmental conditions, (ii)  
125 identify the metabolite classes most perturbed by different stresses, (iii) discover

126 condition-specific metabolites that may serve as stress biomarkers, and (iv) establish a  
127 platform for visualization of the global metabolome changes. Towards these goals, we  
128 first performed LC-MS/MS from 17 different organ-condition combinations, including  
129 agriculturally relevant conditions such as copper deficiency, heat stress, low phosphate,  
130 and arbuscular mycorrhizal symbiosis. We used CANOPUS and information theory  
131 derived metrics to compare control vs. test metabolomes across different organs, and  
132 characterize additional metabolome changes through co-accumulation modules and  
133 biomarker detection. Finally, these changes were visualized using a novel representation  
134 on the Bio-Analytic Resource for Plant Biology (BAR) website. Overall, our findings  
135 provide new insights on the global and more specific metabolic perturbations in  
136 *Brachypodium* under different conditions.

137

138

## 139 **Results**

140

### 141 **Experimental design and pre-processing of metabolome data**

142 Brachypodium plants were grown to different ages and under different growth  
143 conditions in order to produce significant metabolome perturbations. Roots, leaves  
144 (young and mature combined), and in some cases, culms and spikelets were sampled.  
145 Overall, 17 organ-condition combinations were sampled, with plants grown across three  
146 major regimens: Hydroponics (Hydro), Symbiosis (Sym), and Tissue (Tis) (**Fig. 1, Supp.**  
147 **Fig. 1**). Hydro treatments consisted of regular Cu (Control), Cu deficiency (NoCopper),  
148 heat stress (Heat), and heat stress under Cu deficiency (HeatNoCopper). The Symbiosis  
149 treatments consisted of plants grown with regular amounts of phosphate fertilization  
150 (Control), low phosphate treated plants inoculated with a solution of *Rhizophagus*  
151 *irregularis* spore growth medium (SporeW, not containing any spores i.e. mock treatment)  
152 and low phosphate treated plants inoculated with *R. irregularis* spores (Spore). The  
153 Tissue regimen involved growing plants in regular soil until maturity. The effectiveness of  
154 the copper deficiency treatment and presence of colonization were verified through semi-  
155 quantitative RT-PCR of copper deficiency and fungal symbiosis marker genes,  
156 respectively (**Supp. Fig 2**). All samples were analyzed via LC-MS/MS in both positive and  
157 negative mode to obtain a comprehensive, quantitative snapshot of their metabolome.

158 After peak deconvolution and alignment, metabolite values were filtered using a  
159 sequence of steps (**Supp. Figs. 3,4**). To enable comparisons between different LC-MS  
160 runs, we first tested five different data normalization approaches (**Supp. File 1**) and  
161 selected Variance Stabilized Normalization (VSN) as the most appropriate based on  
162 performance as well as availability of the algorithm (**Supp. Table 1; Supp. File 1**). Data  
163 imputation was also performed to fill in values lost due to Orbitrap LC-MS detection limits.  
164 To ensure that either step does not alter the overall underlying data structure, we first  
165 determined the effect of performing imputation before vs. after normalization using a  
166 dummy dataset where actual peak areas were randomly replaced by zeros. The degree  
167 of error in normalization-imputation and imputation-normalization was quantified. Overall,  
168 both normalization orders had almost identical errors (**Supp. Fig. 5**). Thus, given  
169 precedence (Mock et al., 2018; Chong et al., 2019), we first imputed peak areas using k-  
170 Nearest Neighbor and normalized the imputed areas using VSN for further downstream  
171 analyses.

172 VSN maximized correlations among replicates while maintaining low correlations  
173 between different treatment groups (**Supp. File 2**). The above ground tissues were found  
174 to have more peaks as well as a higher total peak abundance than the roots (**Supp. Fig**  
175 **6; Supp. File 3**). The largest number of metabolite signals in both organs were observed  
176 in Sym samples, indicating that growth media also influenced the Brachypodium  
177 metabolome. The high numbers of peaks seen in the Sym Spore root samples may  
178 include metabolites of fungal origin. Correlations between leaf vs. root, and between  
179 control vs. treatment, were respectively much or slightly lower than among replicates  
180 (**Supp. File 2**), putatively identifying two other axes of metabolomic divergence between

181 samples. To investigate these further, we first performed a global assessment of  
182 similarities and differences between the metabolomes under different conditions.  
183

### 184 ***The root metabolome is less diverse but more specialized and more stress-*** 185 ***inducible than the leaf metabolome***

186 Using the normalized, imputed datasets, we quantified the impact of each stress  
187 on the root and leaf metabolomes. As expected, Principal Components Analysis (PCA)  
188 identified the organs and the growth media as stronger drivers of metabolic variation in  
189 our samples than the stresses. While PC1, explaining 46.88% and 45.6% of the metabolic  
190 variation between samples (in positive and negative mode, respectively) was indicative  
191 of organ-wise differences, PC2 (12.97%, 13.77%) revealed a substantial impact of the  
192 growth medium (soil type, hydroponics) on the root and leaf metabolomes (**Supp. Fig. 7**).  
193 PCA as well hierarchical clustering (**Supp. Figs. 8,9**) validated close clustering of  
194 replicate samples as well as highlighted set-wise impact of stresses. For the Hydro set,  
195 NoCopper (copper deficiency) was clustered with Control in both leaves and roots, while  
196 for the Sym set, SporeW was the more impactful condition for leaves and Spore for the  
197 roots. HeatNoCopper clustered closer to Heat than NoCopper in both roots and leaves,  
198 indicating that the majority of metabolomic differences in this combined stress was due  
199 to Heat. When PCAs were differentiated by organs (**Supp. Fig. 7 B,C,E,F**), the effect of  
200 different stresses could be observed. Overall, the leaf metabolomes were less impacted  
201 by the stresses than root metabolomes.

202 To further quantify the impact of each stress on the overall sampled metabolome,  
203 we used three information-theory based measures – Diversity (H), Specialization ( $\delta$ ,  
204 measuring uniqueness/differentiation) and Relative Distance Plasticity Index (RDPI,  
205 measuring overall perturbation including up and down-accumulation). We first assessed  
206 the metabolome differences in non-stress conditions. More peaks as well as more  
207 uniformity in the peak areas can increase Diversity; thus, given leaves consistently have  
208 more peaks than roots, culms, and spikelets (**Supp. Fig. 6**), their Diversity is the highest  
209 (**Fig. 2A,B; Supp. Fig. 10A,C**). However, roots and spikelets are more metabolically  
210 specialized. The degree of specialization and to some extent, Diversity, were clearly  
211 dependent on the growth medium and stress (**Fig. 2A,B; Supp. Fig. 10**). Roots were  
212 more specialized in the hydroponic medium (except Sym Spore root) but leaf metabolome  
213 was more specialized in soil (**Supp. Fig. 10B,D**). Intriguingly, the observation of spikelets  
214 being metabolically specialized is congruent with a similar observation in the *Nicotiana*  
215 *attenuata* anthers (Li et al., 2016b), indicating that the metabolic uniqueness of the  
216 reproductive tissues may be a conserved trait across monocots and dicots.

217 Although differences in specialization and diversity among leaf metabolomes were  
218 low, many stresses elicited statistically significant changes (Kolmogorov Smirnov [KS]  
219 test, **Supp. Table 2**). Overall, the stresses appeared to disrupt foliar metabolism far less  
220 than that of the roots – especially for leaves from hydroponically grown plants – as  
221 indicated by tight clustering of leaf stresses with their controls. In positive mode (**Fig. 2A**),  
222 specialization cleanly separated out leaf samples into their growth conditions, but this was



223 not seen in negative mode (**Fig. 2B**), and in both ionization modes, leaf samples had  
224 relatively low specialization. Taken together with the relatively low RDPI values observed  
225 for leaf samples (**Fig. 2C,D**), these results indicate that the leaf metabolome is more  
226 robust/less responsive to temporary environmental changes than the root metabolome.

227 In contrast, the specialization and RDPI of roots were significantly influenced by  
228 stress. In both ionization modes, we found that roots had higher RDPI (i.e. greater  
229 metabolome perturbation) than leaves (except for SporeW, in which leaves had similar  
230 RDPIs to roots in negative mode) (**Fig. 2C,D**). Hydro roots had a higher baseline (Control)  
231 specialization than Sym (**Supp. Fig. 10B,D**), indicating the presence of hydroponics-  
232 specific peaks. However, in both ionization modes, Heat roots and Spore roots had the  
233 highest specialization and RDPI. Specialization is a sum of the “degree of specificity” of  
234 each metabolite signal across the different conditions, thus, high specialization in Heat  
235 and Spore indicates a greater representation of metabolites that are uniquely changing  
236 under these conditions alone. Interestingly, specialization of the HeatNoCopper roots was  
237 similar to Control roots (**Fig. 2A,B**), while its RDPI was intermediate between NoCopper  
238 and Heat (**Fig. 2C,D**). These observations suggest that the impact of heat stress on the  
239 global root metabolome was less drastic under copper deficiency, which is contradictory  
240 to our expectation that HeatNoCopper roots would show a greater perturbation than Heat  
241 roots given a combination of two stresses.

242 To obtain a more granular understanding of the overall induced metabolites,  
243 differentially accumulated peaks (DAPs) were estimated in each condition based on FDR-  
244 corrected p-values and fold-change criteria (see **Supplementary Methods; Supp. File**  
245 **4**). The pattern of differential accumulation was similar between positive and negative  
246 modes (**Fig. 2E,F**). We found that HeatNoCopper and Heat had a high number of DAPs  
247 primarily in the roots (**Fig. 2E,F; Supp. Figs. 11,12,13**). Over 200 metabolites were also  
248 perturbed under AMS in positive as well as negative mode, however, many of these  
249 metabolites could be of fungal origin. Heat and Spore roots had both the highest numbers  
250 of DAPs, and unique DAPs, consistent with the finding that they have high RDPI and the  
251 highest specialization.

252

### 253 ***Assessment of the deep learning-based tool CANOPUS for structural annotation of*** 254 ***LC-MS peaks***

255 The above analyses revealed global patterns of change in the *Brachypodium*  
256 metabolome under environmental change. We next sought to understand shifts in specific  
257 metabolite classes. While untargeted LC-MS is the method of choice for detecting a  
258 diverse range of metabolites, identifying these peaks is a major challenge. We employed  
259 two different approaches for annotating the peaks: 1) MS/MS spectral matching using  
260 public repositories, and 2) database-free prediction of structure-based metabolite classes  
261 using the deep-learning based CANOPUS package in the SIRIUS software (Dührkop et  
262 al., 2021). CANOPUS classifies compounds into the multilabel and hierarchical ChemOnt  
263 ontology (Djoumbou Feunang et al., 2016), which is similar to the Gene Ontology (GO)  
264 for genes (The Gene Ontology Consortium, 2019). As ChemOnt is multilabel, peaks may

265 receive multiple annotations at each level, however, the classifications we report are of  
266 each peak's largest substructure.

267 Of the 3582 and 2996 singly charged fragmented peaks in positive and negative  
268 mode, 2931 (82%) and 2409 (80%) were annotated by CANOPUS at the Superclass level  
269 with posterior probability  $\geq 0.5$  (**Supp. Fig. 14**). Of the 26 Superclasses existing for  
270 Organic Compounds, 14 and 12 were represented in the positive and negative mode  
271 data, respectively (**Supp. Files 5,6**) with Lipids and lipid-like molecules having the most  
272 peaks in both ionization modes. To assess the accuracy of these annotations, we  
273 identified peaks via public database searches and compared their ChemOnt classes to  
274 CANOPUS' predictions (**Table 1, Supp. File 7**). At each level, we calculated  
275 misannotations as the percent of peaks identified using spectral matches that were not  
276 given the same annotation by CANOPUS. At the Superclass level, we observed good  
277 correspondence between CANOPUS classifications and database identifications in both  
278 modes. The median CANOPUS misannotation rates at the Class level, when considering  
279 correct Classes as determined by ClassyFire, were 54.4% and 28.2% in positive and  
280 negative mode, respectively, indicating that overall CANOPUS predicted Classes well for  
281 negative mode only. In positive mode, the most frequently misannotated Classes were  
282 Glycerophospholipids (GPs, 65.57% of CANOPUS-predicted GPs were misannotated)  
283 and Phenols (73.68% misannotated), although most of the misannotations were within  
284 the same Superclass (70% and 50%, respectively). The decrease in agreement between  
285 positive mode Superclasses and Classes is largely due to the high misclassification rate  
286 of GPs and their high presence (24%) in the identified positive mode compounds.

287 We further observed that when discrepancies occurred, it was often due to  
288 CANOPUS labeling compounds based upon substructures that are not representative of  
289 the whole compound, e.g. labeling Flavonoids as Benzenoids/Hydroxycinnamic Acid and  
290 Derivatives, or 1-Palmitoylglycerol as a Fatty Acyl instead of a Glycerolipid. Most  
291 misannotated GPs were classified as Fatty Acyls (subclass: linoleic acid and derivatives),  
292 Sphingolipids (subclass: phosphosphingolipids) or Organonitrogen Compounds  
293 (subclass: phosphocholines), suggesting that despite misclassification, CANOPUS was  
294 identifying common substructures from MS/MS data. It is important to also note, however,  
295 that in instances of disagreement, the specific compound identifications based on spectral  
296 matching may be incorrect, and despite that, both methods generally agree on the  
297 annotations of substructures of the detected peaks.

298 **Table 1: Correspondence between peaks identified using spectral matches and**  
299 **their class predictions using CANOPUS.**

|                   | Positive                                                 |                      | Negative                                                 |                      |
|-------------------|----------------------------------------------------------|----------------------|----------------------------------------------------------|----------------------|
|                   | Identified <sup>1</sup> and Annotated <sup>2</sup> Peaks | % Match <sup>3</sup> | Identified <sup>1</sup> and Annotated <sup>2</sup> Peaks | % Match <sup>3</sup> |
| <b>Superclass</b> | 253                                                      | 77.87                | 153                                                      | 77.78                |
| <b>Class</b>      | 245                                                      | 54.69                | 152                                                      | 70.39                |
| <b>Subclass</b>   | 215                                                      | 53.49                | 143                                                      | 71.33                |
| <b>Level 5</b>    | 123                                                      | 56.10                | 120                                                      | 73.33                |

300 1 Identified using spectral matches with public repositories



301 2 Annotated using CANOPUS  
302 3 Percentage of the Identified and Annotated Peaks with matching annotations

303  
304 In order to further assess the general accuracy of identifications and CANOPUS  
305 annotations, and the disagreements between them for GPs, we used MS/MS molecular  
306 networking as a complementary approach to cluster compounds with similar  
307 fragmentation patterns. We then mapped identifications and CANOPUS Superclasses  
308 onto this network (**Fig 3, Supp. Files 8, 9**). We found that some CANOPUS Superclasses  
309 tended to form tight sub-networks e.g. 236 out of the 240 CANOPUS-annotated GPs in  
310 the negative mode network were clustered together (**Supp. File 9**), along with all of the  
311 database-identified GPs. In the positive mode network, we observed two clusters for GPs  
312 -- one for peaks identified as Glycerophosphocholines/Glycerophosphoserines and  
313 another for peaks identified as Glycerophosphoethanolamines (Subnetworks 1 and 2,  
314 respectively, in **Fig 3, Supp. File 8**). For other sub-networks (3,4,5 **Fig. 3**), there was  
315 good agreement between CANOPUS and identified compound class predictions (**Supp.**  
316 **File 7**). These results suggest that while there is some disagreement between spectral  
317 matching and CANOPUS, both methods are reflective of actual molecular substructures.  
318 While Class level interpretation is appropriate for peaks in negative mode, Superclass  
319 level interpretation is appropriate for positive mode. Thus, while we conduct analyses  
320 below using the more specific Class-level annotations, we primarily interpret results from  
321 negative mode data.

### 322 323 ***Compound class annotation reveals an important role of lipids in the induced*** 324 ***stress response***

325 After validating CANOPUS annotations, we sought to determine how different  
326 chemical classes were perturbed under the applied stresses, and whether the relevance  
327 of a class to a stress or organ could be quantified. The RDPI metric summarizes both up  
328 and down regulation of all metabolites in a given class, and thus, is a useful metric to  
329 assess a class' overall perturbation in a given stress (**Supp. Figs. 15, 16; Supp. File 10**).  
330 As expected, RDPI distributions of most Classes (e.g. Organooxygen compounds) were  
331 similar to those of the overall metabolome -- with roots appearing more inducible than  
332 leaves, and Heat, HeatNoCopper and Spore treatments eliciting the largest metabolome  
333 changes. However, some Classes -- primarily lipids such as Fatty Acyls, Glycerolipids,  
334 Glycerophospholipids (GPs), sphingolipids and steroids -- deviated from this overall trend.

335 Although the RDPI is a useful metric for quantifying gross metabolomic changes,  
336 information on whether peaks are accumulated or depleted under stress conditions is lost.  
337 Another issue is that our criteria for calling DAPs is stringent, thus high RDPI does not  
338 necessarily translate to more DAPs. Lastly, the RDPI metric for a Class with 1000  
339 metabolites vs. 10 metabolites can appear the same, confounding the true extent of a  
340 metabolite Class' importance in a condition. To address these issues, we identified  
341 Classes that were, on average, highly accumulated or depleted in a stress (see Methods),  
342 and plotted the abundance changes of individual peaks in those Classes (**Fig. 4, and**  
343 **Supp. Fig. 17A**). Many Classes had expected changes in abundance, which corroborates

344 this methodology. For example, in spore-treated samples, lipid Classes such as  
345 glycerolipids and GPs decreased (leaves) while prenol lipids and sphingolipids increased  
346 (roots) (**Fig. 4**), consistent with their importance in membrane remodeling and signaling  
347 during plant-AMF interactions (Wewer et al., 2014; Macabuhay et al., 2022). Interestingly,  
348 more sphingolipids showed a decrease in the leaves, but the pattern was reversed in the  
349 roots. Phenolic compounds (Phenols) are known to be induced in the leaves of multiple  
350 species under symbiosis (Schweiger and Müller, 2015), which was also observed. In both  
351 leaves and roots of Cu-deficient plants, GPs showed both up and down regulation, while  
352 sphingolipids were mostly upregulated in the roots. Increase in sphingolipids was also  
353 seen in Heat stress. A previous study showed that perturbation of sphingolipid  
354 biosynthesis in the roots influences the leaf ionome (Chao et al., 2011), and thus,  
355 sphingolipids may play consequential roles in both Cu-deficiency and heat stress. Some  
356 lignans were also found to be downregulated in Cu-deficient and heat treated plants in  
357 both leaves and roots, consistent with previous observations of lignin biosynthesis  
358 affected under copper deficiency (Schulten and Krämer, 2018; Rahmati Ishka and  
359 Vatamaniuk, 2020).

360 Other classes showed unexpected changes. Although flavonoids are antioxidants,  
361 they were, on average, depleted in the roots under multiple stresses (**Fig. 4**). Multiple  
362 classes possess outliers present on both sides of the distribution, e.g. Sphingolipids in  
363 Spore leaves, suggesting that peaks within the same structural class are not necessarily  
364 co-regulated. Finally, we identified classes that were strongly up- or down- accumulated  
365 (multiple peaks with area changes > 5 in magnitude) in response to multiple stresses,  
366 most of which were lipids e.g. GPs, Fatty Acyls, Sphingolipids and Prenol lipids (**Fig. 4**).  
367 These observations suggest that the lipidome is the most stress-responsive portion of the  
368 metabolome, possibly resulting from changes in cellular membranes and signaling  
369 pathways.

370

### 371 ***Co-accumulated peaks have diverse structural classes, and peaks within a class*** 372 ***rarely co-accumulate***

373 As many classes showed broad changes in response to a stress, we next  
374 assessed the diversity of structural classes among groups of correlated peaks as  
375 determined using Weighted Gene Coexpression Network Analysis (WGCNA) (Langfelder  
376 and Horvath, 2008) (**Fig. 5A** and **Supp. Figs. 17,18,19**). WGCNA provides a  
377 complimentary approach to assign functional hypotheses to metabolite classes under  
378 stresses, as it simultaneously assesses all conditions and classes. We found that most  
379 co-accumulation modules contained peaks with high abundance in roots and low in  
380 leaves, or vice versa, again highlighting organs as primary drivers for metabolic diversity.  
381 One module (“cyan”) identified peaks specifically accumulated in Sym.Spore roots (**Supp.**  
382 **Fig. 19**), a quarter of which were annotated as sphingolipids, again suggesting the  
383 importance of sphingolipids in AMS. Other modules contained peaks with more varied  
384 accumulation patterns. For example, the “turquoise” module identified peaks that were  
385 either specifically accumulated in hydroponics roots or excluded from them. The “gray60”  
386 module (**Supp. Fig. 19**) grouped peaks abundant in leaves but excluded from all roots

387 except those experiencing AMS. These may represent foliar metabolites that undergo  
388 transport to the roots and play a role in symbiosis. A more detailed analysis of these peaks  
389 can reveal novel insights into the biochemistry of *Brachypodium* abiotic and biotic  
390 responses.

391 A majority of WGCNA modules contained multiple Classes, and 7/18 modules  
392 were enriched in  $\geq 1$  Class (Fisher's exact test, FDR adjusted  $p < 0.05$ ). Some metabolite  
393 classes, such as Flavonoids, were enriched in multiple modules with differing abundance  
394 patterns (**Supp. Figs. 18, 19**). Cinnamic acids and flavonoids were usually significantly  
395 overrepresented in modules with higher accumulation in leaves than roots. Interestingly,  
396 cinnamic acids were perturbed substantially in leaves only under heat stress, while they  
397 were highly perturbed in roots under all conditions (**Supp. Fig. 16**). Flavonoids, on the  
398 other hand, were significantly highly perturbed only in roots but not in leaves (**Supp. Figs.**  
399 **16, 17**). These results point to differing regulation of individual metabolite classes in roots  
400 vs. leaves. Also, of the ten Classes enriched across all modules, in either positive or  
401 negative mode, seven were lipids, further highlighting their functional relevance.

402 To determine if "Class" is too broad a level for co-regulation, and if more evidence  
403 for co-regulation is found at the "Subclass" or "Level 5" level, the average pairwise  
404 Spearman correlation among peaks in the same Class, Subclass, or Level 5 category  
405 (**Fig. 5B** and **Supp. Fig. 17C**), was compared to the average correlation among randomly  
406 drawn peaks. At each hierarchy level, only a small number of classes had average  
407 correlation  $\geq 0.5$ , and most classes had correlation close to random. Notably, at each level  
408 of the hierarchy, several classes were unusually large, with  $> 100$  members, raising the  
409 possibility of low structural similarity within each class. Thus, we sought to determine  
410 whether class size and structural similarity within class contribute to average class  
411 correlation (see **Supplementary Methods** for calculation). Correlations between average  
412 class correlation and average class cosine score were consistently positive (**Supp. Figs.**  
413 **20, 21**) suggesting greater structural similarity within a class translates to greater  
414 accumulation correlation. Correlations between class size and correlation/cosine score  
415 were negative, highlighting the importance of more specific class definitions. We note that  
416 overall, these metrics explained only a very low proportion of variance.

417 Taken together, these results indicate that while some classes (e.g. Flavonoids  
418 and their subclasses) may represent groups of co-regulated peaks, this is likely not the  
419 case for most classes at each level of the ontology. This may reflect the specificity of  
420 underlying metabolic and regulatory pathways, which may significantly increase  
421 concentrations of specific individual metabolites of a structural class. These results also  
422 suggest that utilizing the multi-label nature of the chemical ontology could be a better  
423 approach for finding peaks belonging to coordinated routes of metabolism rather than  
424 using single classes.

## 425 426 ***Comparative analysis facilitates analysis of known metabolites and biomarker*** 427 ***detection***

428 Our dataset provides a unique opportunity to analyze the accumulation patterns of  
429 known metabolites, as well as find biomarkers, i.e. peaks that accumulate highly (not

430 necessarily specifically; see **Supplementary Methods**) in one condition/organ. We  
431 selected salicylic acid (SA), abscisic acid (ABA), and naringenin for analysis as they were  
432 identified by GNPS with match scores  $\geq 0.89$  (ABA and naringenin were additionally  
433 correctly annotated by CANOPUS), and may be of relevance in the studied conditions.  
434 We further validated these identifications by uncovering their major fragments from the  
435 literature, and checking for matching fragments in our queries (**Supp. Table 3**). SA is  
436 known to accumulate in roots under AMS (Zhang et al., 2013) and, in some species,  
437 under heat (Hara et al., 2012). We found that SA accumulated (but not significantly  
438 increased) in AMS roots, and was mildly but significantly increased in Heat roots (t-test,  
439 p-value < 0.05) (**Supp. Fig. 22**). In contrast, ABA levels highly increased in AMS roots,  
440 and in Heat and HeatNoCopper leaves (t-test, p-values < 0.05). Finally, for naringenin,  
441 mean decreases were observed in roots for all conditions (significant decreases seen in  
442 Heat and AMS; t-test, p-values < 0.05) corroborating our observations of RDPI of the  
443 broader Flavonoid Class.

444 We also found that the numbers of biomarkers detected in each condition  
445 resembled the overall RDPI distribution -- roots typically have more biomarkers than their  
446 foliar counterparts, and Spore roots and Heat roots have the highest numbers of  
447 biomarkers (**Fig. 5C** and **Supp. Fig. 17D; Supp. File 11**). We found 11-carboxyblumenol  
448 C glucoside to be a foliar biomarker for AMS, corroborating previously published data  
449 (Wang et al., 2018a) (**Supp. Fig. 23A**). We discovered other peaks that either share  
450 fragment peaks with the Blumenol C or exhibit fragment peaks of a Blumenol C core  
451 lacking a carboxyl group (**Supp. Fig. 23B, D**). We also detected a peak specific to Spore  
452 leaf and not present in AMS roots, which shares no fragment peaks with the Blumenol C  
453 and was classified by CANOPUS as a 5'-deoxyribonucleoside (**Supp. Fig. 23C**) --  
454 suggesting that AMS induces other foliar-specific routes of metabolism.

455

### 456 ***Visualizing metabolite class importance using the BAR platform***

457 In order to make the data described herein more easily accessible to the scientific  
458 community, these data were integrated into the Bio-Analytic Resource for Plant Biology  
459 (BAR) website as a novel electronic Fluorescent Pictograph (eFP) browser (available for  
460 testing at: [https://bar.utoronto.ca/efp\\_brachypodium\\_metabolites/cgi-bin/efpWeb.cgi](https://bar.utoronto.ca/efp_brachypodium_metabolites/cgi-bin/efpWeb.cgi)).  
461 CANOPUS Classes with at least five members in both positive *and* negative modes were  
462 included in this eFP browser. This eFP browser has two viewing options: with the Relative  
463 viewing option, the changes of metabolite Class levels across conditions can be readily  
464 observed (**Fig. 6**) as the average change in normalized peak area under a condition. With  
465 the Absolute viewing option, the average normalized peak areas are plotted per organ  
466 and condition. Besides showing how the Class changes in abundance across conditions,  
467 the Absolute view option also provides information about which ionization mode best  
468 illustrates changes experienced in that Class. Notably, for some Classes (e.g. Furanoid  
469 lignans, Purine nucleotides) we observe different changes in abundance across ionization  
470 modes. While this may be due to CANOPUS peak misannotations, especially for Positive  
471 mode, it may also reflect different subclasses being detected in different ionization modes.  
472 This finding has implications for targeted comparative metabolomics studies, as results



473 obtained in one ionization mode may not necessarily hold in the other. By establishing  
474 our eFP browser, we seek to enable the community to draw further conclusions from our  
475 existing results, and facilitate the design of future comparative metabolomics and  
476 downstream validation studies.

477

## 478 **Discussion**

479

480 While recent improvements in LC-MS hardware have generated impressive  
481 advancements in metabolite detection, associating the thousands of metabolites detected  
482 in each species with biological processes remains an open challenge (Chaleckis et al.,  
483 2019). In this study, using three complementary approaches – information theory, ML-  
484 based analysis and co-accumulation clustering – of LC-MS data, we performed a more  
485 comprehensive analysis of metabolome perturbations of *B. distachyon* under different  
486 environmental conditions.

487 When applying information theoretic measures to the global metabolome, we  
488 found that roots are, on the whole, more stress-responsive than leaves, despite leaves  
489 having a more expansive and complex metabolome. The finding that leaves have  
490 consistently more peaks than roots may be due to biological or technical/processing  
491 reasons, as root harvesting required a washing/drying step to remove the attached soil  
492 particles, which may have also removed epidermal metabolites. While the increased  
493 number of peaks in foliar samples directly contributes to their increased diversity, the  
494 finding that leaf metabolomes are less perturbed under stress than roots is intriguing.  
495 Previous studies have also found roots to be more impacted than leaves under a variety  
496 of stresses, including heat (Giri et al., 2017), and salinity (López-Cristoffanini et al., 2021).  
497 Notably, drought stress -- not included in our study -- appears to be an exception in which  
498 leaves are more impacted than roots (Gargallo-Garriga et al., 2014), indicating that the  
499 greater metabolic plasticity of the roots is not universal. These results may again be due  
500 to technical considerations, as peaks with  $m/z > 800$  were not detected, thereby excluding  
501 cuticular waxes, which are stress-responsive (Baker, 1974; Wang et al., 2018b; Kan et  
502 al., 2022). Additionally, highly polar and highly non-polar compounds were excluded from  
503 our data. Both roots and leaves contain such compounds, and therefore it is unclear how  
504 results would differ with these compounds included.

505 Our analyses revealed that the combined HeatNoCopper stress was less  
506 disruptive to the root metabolome than the Heat stress alone -- suggesting that one week  
507 of Cu deficiency primed the roots for subsequent protection against heat stress response.  
508 Another interpretation is that critical heat response mechanisms were not activated in the  
509 roots after a week of Cu deficiency, which could therefore lead to decreased reproduction  
510 or long-term survival after heat. Since the recovery of these plants were not studied, it is  
511 not possible to ascertain which interpretation is correct. However, these results reveal an  
512 intriguing interplay between heat stress and Cu deficiency. In *Arabidopsis*, such an  
513 interplay is suggested through shared aspects of heat and Cu deficiency responses. For  
514 example, Cu deficiency triggers accumulation of ferric superoxide dismutase 1 to account  
515 for reduced activity of Cu/Zn superoxide dismutases (Abdel-Ghany and Pilon, 2008). This



516 shift may help protect the roots against reactive oxygen species produced during later  
517 heat shock. Recent evidence has also suggested that SPL7, a master regulator of Cu  
518 deficiency (Yamasaki et al., 2009), may upregulate miR156 under Cu deficiency (Perea-  
519 García et al., 2021). In Arabidopsis, miR156 is induced after an initial heat stress event  
520 and provides heat shock memory, as plants lacking miR156 showed decreased growth  
521 and survival after subsequent heat events (Stief et al., 2014). As miR156 is also induced  
522 in wheat after heat stress (Xin et al., 2010), and as several miRNAs are known to have  
523 different induction patterns in different tissues (Sunkar et al., 2012), we hypothesize that  
524 miR156 upregulation under Cu deficiency helps prime Brachypodium roots for heat  
525 stress. Future molecular studies can help test these hypotheses.

526 In this study, we combined CANOPUS -- a tool for structurally annotating peaks --  
527 with information theoretic and related measures to analyze more specific metabolome  
528 perturbations. Our study captured a multi-pronged, organ-differentiated metabolomic  
529 response of Brachypodium to environmental change comprising lipidomic perturbations  
530 and alterations of phenylpropanoid pathway products such as lignans, cinnamic acids,  
531 and flavonoids. Lipids, on the whole, are highly stress-responsive, with glycerolipids, GPs,  
532 sphingolipids and fatty acyls having high perturbations under several conditions. These  
533 perturbations may be a result of changes in membrane composition (known to occur  
534 under heat (Higashi and Saito, 2019) and low P stress (Nakamura, 2013)), and/or  
535 production of lipid signaling molecules, such as oxylipins (Ali and Baek, 2020) and  
536 sphingolipids (Berkey et al., 2012). Under AMS specifically, certain fatty acyls and GPs  
537 are known to be produced (Wewer et al., 2014; Bravo et al., 2017), and while this is indeed  
538 reflected in our data (**Supp. File 10**) we also found that other lipid Classes, such as  
539 Sphingolipids and Prenol lipids, were highly altered under AMS, suggesting that AMS has  
540 wide-reaching effects on the Brachypodium lipidome. We unexpectedly found that  
541 flavonoids are, on average, decreased in the roots in response to all conditions except  
542 low P – a finding corroborated by a focused assessment of naringenin. The training data  
543 for CANOPUS for flavonoids was also large (Dührkop et al., 2021) – given their high  
544 representation in public databases – thus, flavonoid class predictions are likely to be  
545 correct. This inference was also previously confirmed in sweet potato flavonoids and  
546 anthocyanins via comparison with MS/MS networking (Bennett et al., 2021). In general,  
547 flavonoids are known to be accumulated under several stresses (Ferdinando et al., 2012),  
548 yet the wholesale labelling of all flavonoids as antioxidants has been questioned (Agati  
549 et al., 2020). Several studies have additionally found disordered regulation of flavonoid  
550 biosynthesis, either at the level of individual flavonoids/flavonoid biosynthetic genes (Wu  
551 et al., 2020) or post-transcriptional regulation of flavonoid biosynthesis (Cui et al., 2019).  
552 These observations reveal a need for a deeper investigation of flavonoid roles and/or  
553 metabolic reprogramming under stress. We further found that WGCNA, a tool commonly  
554 used in RNA-seq studies, is effective at uncovering peaks with similar abundance  
555 patterns, which are potentially in the same routes of metabolism. Our study was also able  
556 to detect biomarkers, which can reveal novel insights into condition-specific activations of  
557 metabolic pathways.

558 In conclusion, we found that information theory metrics and chemical class  
559 predictions are effective tools to analyze comparative metabolomics data. Our results  
560 reveal a very dynamic plant metabolome influenced by multiple environmental and  
561 developmental factors. As more untargeted LC-MS/MS studies are performed,  
562 comparative analyses of these datasets may reveal common patterns and the core stress  
563 response across groups of plant species. The overall workflow described here can enable  
564 a more streamlined analyses of such untargeted datasets. Particularly, visualizing  
565 metabolomic data using the eFP browser may reveal hidden spatial differences in  
566 metabolome perturbations not easily discernible otherwise, and guide the design of  
567 targeted studies. For example, this visualization can be a useful tool to identify a better  
568 mode of ionization for molecules of interest as well as reveal metabolite classes to be  
569 assessed via targeted analyses. Our study shows that data-intensive analytical methods  
570 are useful for gleaning novel biological insights from untargeted metabolomics studies.

571

## 572 **Materials and Methods**

573

### 574 ***Plant Growth Conditions and Harvesting***

575 *Brachypodium distachyon* Bd-21 seeds for plants used in the Symbiosis (Sym) and  
576 Tissue (Tis) experiments were sterilized in 10% (v/v) household bleach containing  
577 0.005% (v/v) Tween-20 for seven minutes, thoroughly washed 5x in sterile water and  
578 germinated in petri dishes on moist Whatman filter paper in dark at 4 °C for seven days  
579 and three additional days at room temperature (RT). Germinated seedlings were  
580 incubated for additional 3-5 days under constant light while maintaining constant humidity.  
581 The germination protocol for plants used in the Hydro experiment was performed as  
582 outlined previously (Sheng et al., 2021). Additional details about plant growth conditions  
583 are described in **Supplementary Methods**. After the growth period, harvesting of all plant  
584 material took place between noon and 3pm to maintain circadian profiles of genes and  
585 metabolites. All samples were stored at -80 °C until further processing. We verified that  
586 the Cu-deficiency and AMS conditions worked as expected using RT-PCR of previously  
587 known condition-specific genes (Rahmati Ishka and Vatamaniuk, 2020) (**Supplementary**  
588 **Methods**).

589

### 590 ***Metabolite Extraction and Sample Preparation***

591 All plant material was rough ground over liquid nitrogen using scissors to enable  
592 equal and homogenous separation for RNA and metabolite extraction. All samples were  
593 further subjected to bead homogenization using a mixer mill (Retsch, Haan, Germany) at  
594 30 bpm with 1-minute intervals in 2 mL reaction tubes containing four 2.3 mm chrome  
595 steel beads. Ground samples were lyophilized overnight. Sample fresh weights (200 mg  
596 leaves, 550 mg roots, 150 mg spikelets and culms) were determined to ensure 50 mg of  
597 dry weight for all tissues. Samples were ground again in the bead homogenizer for 10  
598 minutes, and centrifuged at 14000 g for 10 minutes in order to collect all powdered sample

599 at the bottom of the tube. Metabolites were extracted using a mixture of acetonitrile,  
600 isopropanol, and water (ratio of 2:2:1) containing 0.1% (v/v) formic acid, and 30 uM of  
601 three internal standards (Telmisartan, Propyl-4-hydroxy-benzoate, and Kanamycin). After  
602 solvent addition, samples were vortexed several times over a period of 15 minutes to  
603 facilitate extraction. After centrifugation for 10 minutes at 16000 g to remove particulates,  
604 the samples were transferred into amber HPLC vials and stored at -80 °C until LC-MS  
605 analysis. Sample vials were shipped to the Joint Genome Institute on dry ice for LC-MS  
606 analysis, where LC-MS was performed using an Agilent 1290 Infinity LC system (Agilent,  
607 Santa Clara, CA) coupled to a Thermo QExactive HF orbitrap mass spectrometer  
608 (Thermo Scientific, San Jose, CA). Additional details are provided in the **Supplementary**  
609 **Methods**.

610

### 611 ***Metabolomic data filtering, normalization, and imputation***

612 All RAW files were converted to mzML format using ProteoWizard v 3.0.7230. TICs  
613 were made for all files of a given polarity using XCMS (Mahieu et al., 2016) (**Supp. Fig.**  
614 **3**). All files of a given mode (positive or negative) were then imported into MS-DIAL v4.48  
615 (Tsubawa et al., 2020) for peak deconvolution and alignment. Parameters files for positive  
616 and negative mode usage are supplied (**Supp. File 12**). The peak areas of the internal  
617 standards Telmisartan and Propyl-4-hydroxy-benzoate were manually checked to  
618 determine consistency across samples. For each polarity, MS-DIAL outputs a quantitative  
619 alignment file, displaying the peak areas of all metabolites in all samples, and a Mascot  
620 Generic Format (mgf) file of all fragmented metabolites. Detected metabolites were  
621 filtered, imputed, and normalized using a custom R script (developed in R v4.0.4) (R Core  
622 Team, 2020), available on GitHub ([https://github.com/lizmahood/brachy\\_metabolomics](https://github.com/lizmahood/brachy_metabolomics))  
623 as described in **Supp. Fig. 4**. Metabolites eluting out at 90 seconds or earlier were  
624 removed as the Total Ion Current observed at the beginning of runs was high enough that  
625 accurate quantification of metabolite values could not be assured (**Supp. Fig. 3**).  
626 Imputation was performed with the R package impute and VSN was performed with the  
627 R package vsn (Huber et al., 2002). Normalization was performed using NOREVA (Li et  
628 al., 2016a), followed by identification of differentially accumulated metabolites, both of  
629 which are described in more detail in **Supplementary Methods**.

630

### 631 ***Peak annotation with CANOPUS***

632 The mgf format MS-DIAL output files were filtered to remove adducts and peaks  
633 detected in Blank samples using an in-house python script  
634 ([https://github.com/lizmahood/brachy\\_metabolomics](https://github.com/lizmahood/brachy_metabolomics)). The CANOPUS module (Dührkop  
635 et al., 2021), included in the SIRIUS4 v4.9.8 software suite (Dührkop et al., 2019) was  
636 used to annotate singly charged peaks with their probable structural classes, as defined  
637 in the multilabel ChemOnt ontology (Djoumbou Feunang et al., 2016). The Zodiac module  
638 (Ludwig et al., 2020) was additionally used to improve each peak's predicted molecular

639 formula (which CANOPUS uses for annotation). For each compound, CANOPUS predicts  
640 the “Parent Class” – the class of the largest substructure in the molecule – and outputs  
641 the probability that the predicted Parent Class is correct, based upon its training data.  
642 Other predictions are made at different hierarchies of the ontology (Superclass, Subclass,  
643 etc). Any annotation with prediction probability < 0.5 was not considered in downstream  
644 analyses. Additionally, if a classification was discarded for not meeting this probability  
645 threshold, each subsequent prediction (at more specific hierarchies) was removed as  
646 well, regardless of their prediction probabilities.

647

### 648 ***Peak Identification with GNPS and MSDIAL***

649 The “All Public MS/MS” msp files provided by MSDIAL  
650 (<http://prime.psc.riken.jp/comps/msdial/main.html#MSP>) were used for identification.  
651 To remove false positive identifications, we imposed a threshold of >0.8 for both the Dot  
652 Product and Reverse Dot Product scores between the query and database match.  
653 Feature based molecular networking through GNPS (Nothias et al., 2020) workflow v28.2  
654 was additionally used for peak identification. Spectral database libraries included those  
655 publicly available in GNPS, as well as the NIST 17 library, which was kindly provided by  
656 JGI. All parameters for molecular networking were kept at default values excepting:  
657 Precursor ion mass tolerance - 0.01 Da, Library search min matched peaks - 3, Top  
658 results to report per query - 20, Score threshold - 0.4, Maximum analog search mass  
659 difference - 200. We again imposed a threshold of >0.8 for the match score between the  
660 query and database match, and only considered the top 1 match per query.

661 To compare annotations between peak identifications and CANOPUS, InChIs of  
662 identified compounds were converted to InChI-Keys through the chembl\_ikey python  
663 module, and structural classifications were obtained with ClassyFire Batch  
664 (<https://cfb.fiehnlab.ucdavis.edu/>).

665

### 666 ***MS/MS molecular networking***

667 MS-FINDER v3.44 (Tsugawa et al., 2016) was used to perform molecular  
668 networking using the filtered mgf files, with the following parameters: Mass tolerance 0.01,  
669 Relative abundance cutoff 5%, MS/MS similarity cutoff 70%, RT tolerance 100. The  
670 Superclass of each peak, as well as the conditions each peak was identified as  
671 Differentially Abundant in, were added to the node file. The edge file and this augmented  
672 node file were imported into Cytoscape v.3.8.0 (Su et al., 2014) for figure generation using  
673 the Prefuse Force Directed Layout.

674

### 675 ***Estimating information theoretic measures***

676 The following information theoretic metrics were calculated for our dataset as  
677 described previously (Li et al., 2020):  $H_j$  (the Shannon entropy/Metabolomic profile  
678 diversity),  $S_i$  (Metabolomic specificity), and  $\delta_j$  (Metabolome specialization index). The

679 Relative Distance Plasticity Index (RDPI), as calculated for all peaks in each stress  
680 condition, was also determined as described previously (Valladares et al., 2006). The  
681 RDPI calculation was applied to the entire metabolome, and then applied separately to  
682 each compound class (for compound classes with at least five peaks classified into them).

683 The RDPI formula was amended in order to determine if a class is up- or down-  
684 accumulating under a stress. Briefly, for each condition-control pair of samples, a  
685 distribution of the abundance changes of all peaks was made, and the mean change in  
686 peak abundance was calculated per class. Let  $d_{ij \rightarrow i'j'}$  represent the peak area changes to  
687 all peaks  $i$  common to a condition-control pair ( $j \rightarrow j'$ ). The mean value of the peak area  
688 change for each compound class was computed as  $\sum(d_{ij \rightarrow i'j'}) / n$ , where  $n$  is the  
689 number of peaks per class. For each condition, these per-class mean values were  
690 compared to the overall distribution of  $d_{ij \rightarrow i'j'}$  across all metabolite peaks to determine the  
691 percentile of the per-class value with respect to the peak area changes of all compared  
692 metabolites. For the purposes of plotting in Fig. 4, the classes with percentiles  $>70$  (large  
693 average increase in abundance) or  $<30$  (large average decrease in abundance) and at  
694 least five members were identified, and up to five classes with the highest/lowest  
695 percentiles were plotted.

696

### 697 **Weighted Correlation Network Analysis Construction and Module Analysis**

698 Using the Weighted Correlation Network Analysis (WGCNA) R package  
699 (Langfelder and Horvath, 2008), an unsigned adjacency network was made from the  
700 normalized area of all fragmented peaks. The soft powers were 129 and 131 in positive  
701 mode and negative mode, as these were the lowest values achieving a  $R^2$  of at least 0.8.  
702 Hierarchical clustering via the `hclust` function was performed using method = "average".  
703 The minimum module size was 10. All peaks that failed to be assigned to a module were  
704 discarded, and the remaining peaks were re-clustered into a dendrogram, and visualized  
705 alongside their Topography Overlap Matrix. The CANOPUS class of all peaks in each  
706 significant module was determined. Each class (except "None") was analyzed for  
707 enrichment in a particular module if there were at least 5 members in the module.  
708 Enrichment was calculated using a Fisher's exact test with all fragmented peaks as the  
709 background population.

710

### 711 **Visualizing CANOPUS Class Abundance on the BAR Platform**

712 Briefly, an input image was generated representing the experiments described in this  
713 paper. The eFP Browser code (Winter et al., 2007) was then modified in several ways to  
714 be able to display CANOPUS data. First, the color scheme was modified from the default  
715 yellow-red color scheme of the original eFP Browser, to make a visual distinction between  
716 the metabolite data being displayed in the modified version and transcript data displayed  
717 in the original browser. Second, because CANOPUS data have a lower dispersion, we  
718 introduced a possibility of setting a minimum value for the color scale other than zero.  
719 Last, CANOPUS classes with at least five members in both Positive *and* Negative



720 ionization modes were included in this eFP browser, and were databased in such a way  
721 that the data from the two modes could be retrieved separately. CANOPUS data may be  
722 freely explored at [https://bar.utoronto.ca/efp\\_brachypodium\\_metabolites/cgi-](https://bar.utoronto.ca/efp_brachypodium_metabolites/cgi-bin/efpWeb.cgi)  
723 [bin/efpWeb.cgi](https://bar.utoronto.ca/efp_brachypodium_metabolites/cgi-bin/efpWeb.cgi).

724

### 725 **Data availability**

726 The LC-MS/MS data is deposited on the GNPS website with the accession ID  
727 MSV000089340. All code developed for analyses is available on the GitHub repository  
728 ([https://github.com/lizmahood/brachy\\_metabolomics](https://github.com/lizmahood/brachy_metabolomics)) also forked on the moghelab  
729 GitHub page.

730

### 731 **Author contributions:**

732 Conceived the study: GDM, MJH, OKV, NJP

733 Planned experiments: Authors that conceived the study plus EHM, AAB, LHK, AB, MRI,  
734 YJ, VL

735 Performed experiments: EHM, AAB, KK, LHK, BPB, KBL, AB, MRI, YJ, VL

736 Wrote the manuscript: EHM, NJP, GDM

737 Reviewed the manuscript: All authors

738

### 739 **Acknowledgements**

740 GDM and EHM would like to thank the Cornell BioHPC Center for assisting with  
741 computing infrastructure and the Cornell and Boyce Thompson Institute Greenhouse staff  
742 for growth chamber maintenance. GDM would like to thank Dr. Trent Northen for initial  
743 discussions during project development. EHM would like to thank Drs. Kai Dührkop and  
744 Sebastian Böcker for explanation of CANOPUS outputs and Dr. Dapeng Li for clarification  
745 of the RDPI formula.

746

### 747 **Funding sources**

748 This research was funded by Cornell Startup Funds and US DoE-Joint Genome Institute  
749 grant #504788 to GDM, USDA-NIFA grant #2021-67034-35227 to EHM, Deutsche  
750 Forschungsgesellschaft award #411255989 to LHK, US DOE BER grant #DE-  
751 SC0012460 to MJH, USDA-NIFA grants #2018-67013-27418 and #2021-67013-33798 to  
752 OKV, and NSERC and the Genome Canada/Ontario Genomics OGI-128 to NJP. The  
753 work 10.46936/10.25585/60001229 conducted by the U.S. Department of Energy Joint  
754 Genome Institute (<https://ror.org/04xm1d337>), a DOE Office of Science User Facility, is  
755 supported by the Office of Science of the U.S. Department of Energy operated under  
756 Contract No. DE-AC02-05CH11231.

757

### 758 **Conflicts of Interest**

759 No conflicts of interest exist.

760

761



## 763 **References**

- 764 **Abdel-Ghany SE, Pilon M** (2008) MicroRNA-mediated Systemic Down-regulation of Copper  
765 Protein Expression in Response to Low Copper Availability in Arabidopsis\*. *Journal of Biological*  
766 *Chemistry* **283**: 15932–15945
- 767 **Afendi FM, Okada T, Yamazaki M, Hirai-Morita A, Nakamura Y, Nakamura K, Ikeda S,**  
768 **Takahashi H, Altaf-UI-Amin Md, Darusman LK, et al** (2012) KNApSAcK Family Databases:  
769 Integrated Metabolite–Plant Species Databases for Multifaceted Plant Research. *Plant and Cell*  
770 *Physiology* **53**: e1
- 771 **Agati G, Brunetti C, Fini A, Gori A, Guidi L, Landi M, Sebastiani F, Tattini M** (2020) Are  
772 Flavonoids Effective Antioxidants in Plants? Twenty Years of Our Investigation. *Antioxidants* **9**:  
773 1098
- 774 **Ali MS, Baek K-H** (2020) Jasmonic Acid Signaling Pathway in Response to Abiotic Stresses in  
775 Plants. *International Journal of Molecular Sciences* **21**: 621
- 776 **Baker EA** (1974) The Influence of Environment on Leaf Wax Development in Brassica Oleracea  
777 Var. Gemmifera. *New Phytologist* **73**: 955–966
- 778 **Bennett AA, Mahood EH, Fan K, Moghe GD** (2021) Untargeted metabolomics of purple and  
779 orange-fleshed sweet potatoes reveals a large structural diversity of anthocyanins and flavonoids.  
780 *Sci Rep* **11**: 16408
- 781 **Berkey R, Bendigeri D, Xiao S** (2012) Sphingolipids and Plant Defense/Disease: The “Death”  
782 Connection and Beyond. *Frontiers in Plant Science* **3**:
- 783 **Bravo A, Brands M, Wewer V, Dörmann P, Harrison MJ** (2017) Arbuscular mycorrhiza-specific  
784 enzymes FatM and RAM2 fine-tune lipid biosynthesis to promote development of arbuscular  
785 mycorrhiza. *New Phytologist* **214**: 1631–1645
- 786 **Brkljacic J, Grotewold E, Scholl R, Mockler T, Garvin DF, Vain P, Brutnell T, Sibout R, Bevan**  
787 **M, Budak H, et al** (2011) Brachypodium as a Model for the Grasses: Today and the Future. *Plant*  
788 *Physiology* **157**: 3–13
- 789 **Bromke MA, Hochmuth A, Tohge T, Fernie AR, Giavalisco P, Burgos A, Willmitzer L,**  
790 **Brotman Y** (2015) Liquid chromatography high-resolution mass spectrometry for fatty acid  
791 profiling. *The Plant Journal* **81**: 529–536
- 792 **Brouard C, Shen H, Dührkop K, d’Alché-Buc F, Böcker S, Rousu J** (2016) Fast metabolite  
793 identification with Input Output Kernel Regression. *Bioinformatics* **32**: i28–i36
- 794 **Chaleckis R, Meister I, Zhang P, Wheelock CE** (2019) Challenges, progress and promises of  
795 metabolite annotation for LC–MS-based metabolomics. *Current Opinion in Biotechnology* **55**: 44–  
796 50
- 797 **Chao D-Y, Gable K, Chen M, Baxter I, Dietrich CR, Cahoon EB, Guerinot ML, Lahner B, Lü**  
798 **S, Markham JE, et al** (2011) Sphingolipids in the Root Play an Important Role in Regulating the  
799 Leaf Ionome in Arabidopsis thaliana. *The Plant Cell* **23**: 1061–1081
- 800 **Charles M, Tang H, Belcram H, Paterson A, Gornicki P, Chalhoub B** (2009) Sixty Million Years  
801 in Evolution of Soft Grain Trait in Grasses: Emergence of the Softness Locus in the Common  
802 Ancestor of Pooideae and Ehrhartoideae, after their Divergence from Panicoideae. *Molecular*  
803 *Biology and Evolution* **26**: 1651–1661
- 804 **Chong J, Wishart DS, Xia J** (2019) Using MetaboAnalyst 4.0 for Comprehensive and Integrative  
805 Metabolomics Data Analysis. *Current Protocols in Bioinformatics* **68**: e86

806 **Cui L, Guo F, Zhang J, Yang S, Meng J, Geng Y, Li X, Wan S** (2019) Synergy of arbuscular  
807 mycorrhizal symbiosis and exogenous Ca<sup>2+</sup> benefits peanut (*Arachis hypogaea* L.) growth  
808 through the shared hormone and flavonoid pathway. *Sci Rep* **9**: 16281

809 **Djombou Feunang Y, Eisner R, Knox C, Chepelev L, Hastings J, Owen G, Fahy E,**  
810 **Steinbeck C, Subramanian S, Bolton E, et al** (2016) ClassyFire: automated chemical  
811 classification with a comprehensive, computable taxonomy. *J Cheminform* **8**: 61

812 **Douché T, Clemente HS, Burlat V, Roujol D, Valot B, Zivy M, Pont-Lezica R, Jamet E** (2013)  
813 *Brachypodium distachyon* as a model plant toward improved biofuel crops: Search for secreted  
814 proteins involved in biogenesis and disassembly of cell wall polymers. *PROTEOMICS* **13**: 2438–  
815 2454

816 **Dührkop K, Fleischauer M, Ludwig M, Aksenov AA, Melnik AV, Meusel M, Dorrestein PC,**  
817 **Rousu J, Böcker S** (2019) SIRIUS 4: a rapid tool for turning tandem mass spectra into metabolite  
818 structure information. *Nat Methods* **16**: 299–302

819 **Dührkop K, Nothias L-F, Fleischauer M, Reher R, Ludwig M, Hoffmann MA, Petras D,**  
820 **Gerwick WH, Rousu J, Dorrestein PC, et al** (2021) Systematic classification of unknown  
821 metabolites using high-resolution fragmentation mass spectra. *Nat Biotechnol* **39**: 462–471

822 **Ferdinando MD, Brunetti C, Fini A, Tattini M** (2012) Flavonoids as Antioxidants in Plants Under  
823 Abiotic Stresses. *In* P Ahmad, MNV Prasad, eds, *Abiotic Stress Responses in Plants: Metabolism,*  
824 *Productivity and Sustainability*. Springer, New York, NY, pp 159–179

825 **Fernie AR** (2007) The future of metabolic phytochemistry: Larger numbers of metabolites, higher  
826 resolution, greater understanding. *Phytochemistry* **68**: 2861–2880

827 **Fukushima A, Kusano M** (2013) Recent Progress in the Development of Metabolome Databases  
828 for Plant Systems Biology. *Frontiers in Plant Science* **4**:

829 **Gargallo-Garriga A, Sardans J, Pérez-Trujillo M, Rivas-Ubach A, Oravec M, Vecerova K,**  
830 **Urban O, Jentsch A, Kreyling J, Beierkuhnlein C, et al** (2014) Opposite metabolic responses  
831 of shoots and roots to drought. *Sci Rep* **4**: 6829

832 **The Gene Ontology Consortium** (2019) The Gene Ontology Resource: 20 years and still GOing  
833 strong. *Nucleic Acids Research* **47**: D330–D338

834 **Giri A, Heckathorn S, Mishra S, Krause C** (2017) Heat Stress Decreases Levels of Nutrient-  
835 Uptake and -Assimilation Proteins in Tomato Roots. *Plants* **6**: 6

836 **Guijas C, Montenegro-Burke JR, Domingo-Almenara X, Palermo A, Warth B, Hermann G,**  
837 **Koellensperger G, Huan T, Uritboonthai W, Aisporna AE, et al** (2018) METLIN: A Technology  
838 Platform for Identifying Knowns and Unknowns. *Anal Chem* **90**: 3156–3164

839 **Hara M, Furukawa J, Sato A, Mizoguchi T, Miura K** (2012) Abiotic Stress and Role of Salicylic  
840 Acid in Plants. *In* P Ahmad, MNV Prasad, eds, *Abiotic Stress Responses in Plants*. Springer New  
841 York, New York, NY, pp 235–251

842 **Higashi Y, Saito K** (2019) Lipidomic studies of membrane glycerolipids in plant leaves under  
843 heat stress. *Progress in Lipid Research* **75**: 100990

844 **Horai H, Arita M, Kanaya S, Nihei Y, Ikeda T, Suwa K, Ojima Y, Tanaka K, Tanaka S, Aoshima**  
845 **K, et al** (2010) MassBank: a public repository for sharing mass spectral data for life sciences.  
846 *Journal of Mass Spectrometry* **45**: 703–714

847 **Huber W, von Heydebreck A, Sültmann H, Poustka A, Vingron M** (2002) Variance stabilization  
848 applied to microarray data calibration and to the quantification of differential expression.  
849 *Bioinformatics* **18**: S96–S104

850 **Itkin M, Heinig U, Tzfadia O, Bhide AJ, Shinde B, Cardenas PD, Bocobza SE, Unger T,**  
851 **Malitsky S, Finkers R, et al** (2013) Biosynthesis of Antinutritional Alkaloids in Solanaceous Crops  
852 Is Mediated by Clustered Genes. *Science* **341**: 175–179

853 **Kan Y, Mu X-R, Zhang H, Gao J, Shan J-X, Ye W-W, Lin H-X** (2022) TT2 controls rice  
854 thermotolerance through SCT1-dependent alteration of wax biosynthesis. *Nat Plants* **8**: 53–67

855 **Langfelder P, Horvath S** (2008) WGCNA: an R package for weighted correlation network  
856 analysis. *BMC Bioinformatics* **9**: 559

857 **Le Bris P, Wang Y, Barbereau C, Antelme S, Cézard L, Legée F, D’Orlando A, Dalmais M,**  
858 **Bendahmane A, Schuetz M, et al** (2019) Inactivation of LACCASE8 and LACCASE5 genes in  
859 *Brachypodium distachyon* leads to severe decrease in lignin content and high increase in  
860 saccharification yield without impacting plant integrity. *Biotechnology for Biofuels* **12**: 181

861 **Li B, Tang J, Yang Q, Cui X, Li S, Chen S, Cao Q, Xue W, Chen N, Zhu F** (2016a) Performance  
862 Evaluation and Online Realization of Data-driven Normalization Methods Used in LC/MS based  
863 Untargeted Metabolomics Analysis. *Sci Rep* **6**: 38881

864 **Li D, Halitschke R, Baldwin IT, Gaquerel E** (2020) Information theory tests critical predictions  
865 of plant defense theory for specialized metabolism. *Science Advances* **6**: eaaz0381

866 **Li D, Heiling S, Baldwin IT, Gaquerel E** (2016b) Illuminating a plant’s tissue-specific metabolic  
867 diversity using computational metabolomics and information theory. *Proceedings of the National*  
868 *Academy of Sciences* **113**: E7610–E7618

869 **López-Cristoffanini C, Bundó M, Serrat X, San Segundo B, López-Carbonell M, Nogués S**  
870 (2021) A comprehensive study of the proteins involved in salinity stress response in roots and  
871 shoots of the FL478 genotype of rice (*Oryza sativa* L. ssp. indica). *The Crop Journal* **9**: 1154–  
872 1168

873 **Ludwig M, Nothias L-F, Dührkop K, Koester I, Fleischauer M, Hoffmann MA, Petras D,**  
874 **Vargas F, Morsy M, Aluwihare L, et al** (2020) Database-independent molecular formula  
875 annotation using Gibbs sampling through ZODIAC. *Nat Mach Intell* **2**: 629–641

876 **Macabuhay A, Arsova B, Walker R, Johnson A, Watt M, Roessner U** (2022) Modulators or  
877 facilitators? Roles of lipids in plant root–microbe interactions. *Trends in Plant Science* **27**: 180–  
878 190

879 **Mahieu NG, Genenbacher JL, Patti GJ** (2016) A roadmap for the XCMS family of software  
880 solutions in metabolomics. *Current Opinion in Chemical Biology* **30**: 87–93

881 **Marriott PE, Sibout R, Lapierre C, Fangel JU, Willats WGT, Hofte H, Gómez LD, McQueen-**  
882 **Mason SJ** (2014) Range of cell-wall alterations enhance saccharification in *Brachypodium*  
883 *distachyon* mutants. *Proceedings of the National Academy of Sciences* **111**: 14601–14606

884 **Mock A, Warta R, Dettling S, Brors B, Jäger D, Herold-Mende C** (2018) MetaboDiff: an R  
885 package for differential metabolomic analysis. *Bioinformatics* **34**: 3417–3418

886 **Nakamura Y** (2013) Phosphate starvation and membrane lipid remodeling in seed plants.  
887 *Progress in Lipid Research* **52**: 43–50



888 **Nothias L-F, Petras D, Schmid R, Dührkop K, Rainer J, Sarvepalli A, Protsyuk I, Ernst M,**  
889 **Tsugawa H, Fleischauer M, et al** (2020) Feature-based molecular networking in the GNPS  
890 analysis environment. *Nat Methods* **17**: 905–908  
891 **Okazaki Y, Otsuki H, Narisawa T, Kobayashi M, Sawai S, Kamide Y, Kusano M, Aoki T, Hirai**  
892 **MY, Saito K** (2013) A new class of plant lipid is essential for protection against phosphorus  
893 depletion. *Nat Commun* **4**: 1510  
894 **Perea-García A, Andrés-Bordería A, Huijser P, Peñarrubia L** (2021) The Copper-microRNA  
895 Pathway Is Integrated with Developmental and Environmental Stress Responses in *Arabidopsis*  
896 *thaliana*. *International Journal of Molecular Sciences* **22**: 9547  
897 **R Core Team** (2020) R: A Language and Environment for Statistical Computing. Vienna, Austria  
898 **Rahmati Ishka M, Vatamaniuk OK** (2020) Copper deficiency alters shoot architecture and  
899 reduces fertility of both gynoecium and androecium in *Arabidopsis thaliana*. *Plant Direct* **4**: e00288  
900 **Salem MA, Perez de Souza L, Serag A, Fernie AR, Farag MA, Ezzat SM, Alseekh S** (2020)  
901 Metabolomics in the Context of Plant Natural Products Research: From Sample Preparation to  
902 Metabolite Analysis. *Metabolites* **10**: 37  
903 **Schulten A, Krämer U** (2018) Interactions Between Copper Homeostasis and Metabolism in  
904 Plants. *In* FM Cánovas, U Lüttge, R Matyssek, eds, *Progress in Botany Vol. 79*. Springer  
905 International Publishing, Cham, pp 111–146  
906 **Schweiger R, Müller C** (2015) Leaf metabolome in arbuscular mycorrhizal symbiosis. *Current*  
907 *Opinion in Plant Biology* **26**: 120–126  
908 **Schymanski EL, Ruttkies C, Krauss M, Brouard C, Kind T, Dührkop K, Allen F, Vaniya A,**  
909 **Verdegem D, Böcker S, et al** (2017) Critical Assessment of Small Molecule Identification 2016:  
910 automated methods. *Journal of Cheminformatics* **9**: 22  
911 **Shahaf N, Rogachev I, Heinig U, Meir S, Malitsky S, Battat M, Wyner H, Zheng S, Wehrens**  
912 **R, Aharoni A** (2016) The WEIZMASS spectral library for high-confidence metabolite  
913 identification. *Nat Commun* **7**: 12423  
914 **Sheng H, Jiang Y, Rahmati M, Chia J-C, Dokuchayeva T, Kavulych Y, Zavodna T-O,**  
915 **Mendoza PN, Huang R, Smieshka LM, et al** (2021) YSL3-mediated copper distribution is  
916 required for fertility, seed size and protein accumulation in *Brachypodium*. *Plant Physiology* **186**:  
917 655–676  
918 **da Silva RR, Dorrestein PC** (2015) Illuminating the dark matter in metabolomics. *Proceedings*  
919 *of the National Academy of Sciences (PNAS)* **112**: 12549–12550  
920 **Šimura J, Antoniadi I, Široká J, Tarkowská D, Strnad M, Ljung K, Novák O** (2018) Plant  
921 Hormonomics: Multiple Phytohormone Profiling by Targeted Metabolomics. *Plant Physiology* **177**:  
922 476–489  
923 **Stief A, Altmann S, Hoffmann K, Pant BD, Scheible W-R, Bäurle I** (2014) *Arabidopsis* miR156  
924 Regulates Tolerance to Recurring Environmental Stress through SPL Transcription Factors. *The*  
925 *Plant Cell* **26**: 1792–1807  
926 **Su G, Morris JH, Demchak B, Bader GD** (2014) Biological Network Exploration with Cytoscape  
927 3. *Current Protocols in Bioinformatics* **47**: 8.13.1-8.13.24  
928 **Sunkar R, Li Y-F, Jagadeeswaran G** (2012) Functions of microRNAs in plant stress responses.  
929 *Trends in Plant Science* **17**: 196–203

- 930 **Tohge T, Wendenburg R, Ishihara H, Nakabayashi R, Watanabe M, Sulpice R, Hoefgen R,**  
931 **Takayama H, Saito K, Stitt M, et al** (2016) Characterization of a recently evolved flavonol-  
932 phenylacyltransferase gene provides signatures of natural light selection in Brassicaceae. *Nat*  
933 *Commun* **7**: 12399
- 934 **Tsugawa H, Ikeda K, Takahashi M, Satoh A, Mori Y, Uchino H, Okahashi N, Yamada Y, Tada**  
935 **I, Bonini P, et al** (2020) A lipidome atlas in MS-DIAL 4. *Nat Biotechnol* **38**: 1159–1163
- 936 **Tsugawa H, Kind T, Nakabayashi R, Yukihira D, Tanaka W, Cajka T, Saito K, Fiehn O, Arita**  
937 **M** (2016) Hydrogen Rearrangement Rules: Computational MS/MS Fragmentation and Structure  
938 Elucidation Using MS-FINDER Software. *Anal Chem* **88**: 7946–7958
- 939 **Valladares F, Sanchez-Gomez D, Zavala MA** (2006) Quantitative estimation of phenotypic  
940 plasticity: bridging the gap between the evolutionary concept and its ecological applications.  
941 *Journal of Ecology* **94**: 1103–1116
- 942 **Wang M, Carver JJ, Phelan VV, Sanchez LM, Garg N, Peng Y, Nguyen DD, Watrous J,**  
943 **Kapono CA, Luzzatto-Knaan T, et al** (2016) Sharing and community curation of mass  
944 spectrometry data with Global Natural Products Social Molecular Networking. *Nat Biotechnol* **34**:  
945 828–837
- 946 **Wang M, Schäfer M, Li D, Halitschke R, Dong C, McGale E, Paetz C, Song Y, Li S, Dong J,**  
947 **et al** (2018a) Blumenols as shoot markers of root symbiosis with arbuscular mycorrhizal fungi.  
948 *eLife* **7**: e37093
- 949 **Wang Z, Tian X, Zhao Q, Liu Z, Li X, Ren Y, Tang J, Fang J, Xu Q, Bu Q** (2018b) The E3  
950 Ligase DROUGHT HYPERSENSITIVE Negatively Regulates Cuticular Wax Biosynthesis by  
951 Promoting the Degradation of Transcription Factor ROC4 in Rice. *The Plant Cell* **30**: 228–244
- 952 **Wewer V, Brands M, Dörmann P** (2014) Fatty acid synthesis and lipid metabolism in the obligate  
953 biotrophic fungus *Rhizophagus irregularis* during mycorrhization of *Lotus japonicus*. *The Plant*  
954 *Journal* **79**: 398–412
- 955 **Winter D, Vinegar B, Nahal H, Ammar R, Wilson GV, Provart NJ** (2007) An “Electronic  
956 Fluorescent Pictograph” Browser for Exploring and Analyzing Large-Scale Biological Data Sets.  
957 *PLOS ONE* **2**: e718
- 958 **Wu X, Zhang S, Liu X, Shang J, Zhang A, Zhu Z, Zha D** (2020) Chalcone synthase (CHS) family  
959 members analysis from eggplant (*Solanum melongena* L.) in the flavonoid biosynthetic pathway  
960 and expression patterns in response to heat stress. *PLOS ONE* **15**: e0226537
- 961 **Xin M, Wang Y, Yao Y, Xie C, Peng H, Ni Z, Sun Q** (2010) Diverse set of microRNAs are  
962 responsive to powdery mildew infection and heat stress in wheat (*Triticum aestivum* L.). *BMC*  
963 *Plant Biology* **10**: 123
- 964 **Yamasaki H, Hayashi M, Fukazawa M, Kobayashi Y, Shikanai T** (2009) SQUAMOSA Promoter  
965 Binding Protein–Like7 Is a Central Regulator for Copper Homeostasis in *Arabidopsis*. *The Plant*  
966 *Cell* **21**: 347–361
- 967 **Zhang R-Q, Zhu H-H, Zhao H-Q, Yao Q** (2013) Arbuscular mycorrhizal fungal inoculation  
968 increases phenolic synthesis in clover roots via hydrogen peroxide, salicylic acid and nitric oxide  
969 signaling pathways. *Journal of Plant Physiology* **170**: 74–79
- 970 **Zu P, Boege K, del-Val E, Schuman MC, Stevenson PC, Zaldivar-Riverón A, Saavedra S**  
971 (2020) Information arms race explains plant-herbivore chemical communication in ecological  
972 communities. *Science* **368**: 1377–1381



**Figure 1**

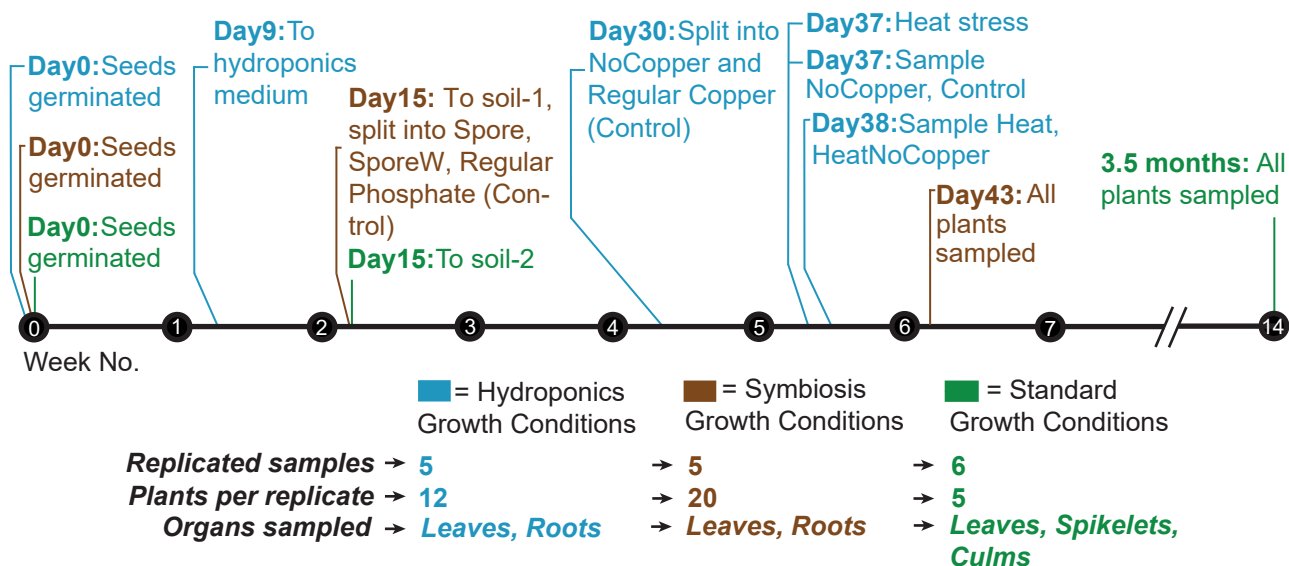

**Figure 1: Timeline and Schematic of the Experimental Design.** The number of samples, plants per replicate, and organs sampled for each set of growth conditions is shown, along with the timeline of important events such as treatment induction and harvesting. Divergent growth and stress conditions were chosen to induce variability in metabolic profiles. Days are counted post germination. Soil-1 and soil-2 refer to different soil mixes. The germination protocol for Hydroponics seeds was distinct from the germination protocol for the other growth conditions (see Supplemental Methods).

**Figure 2**

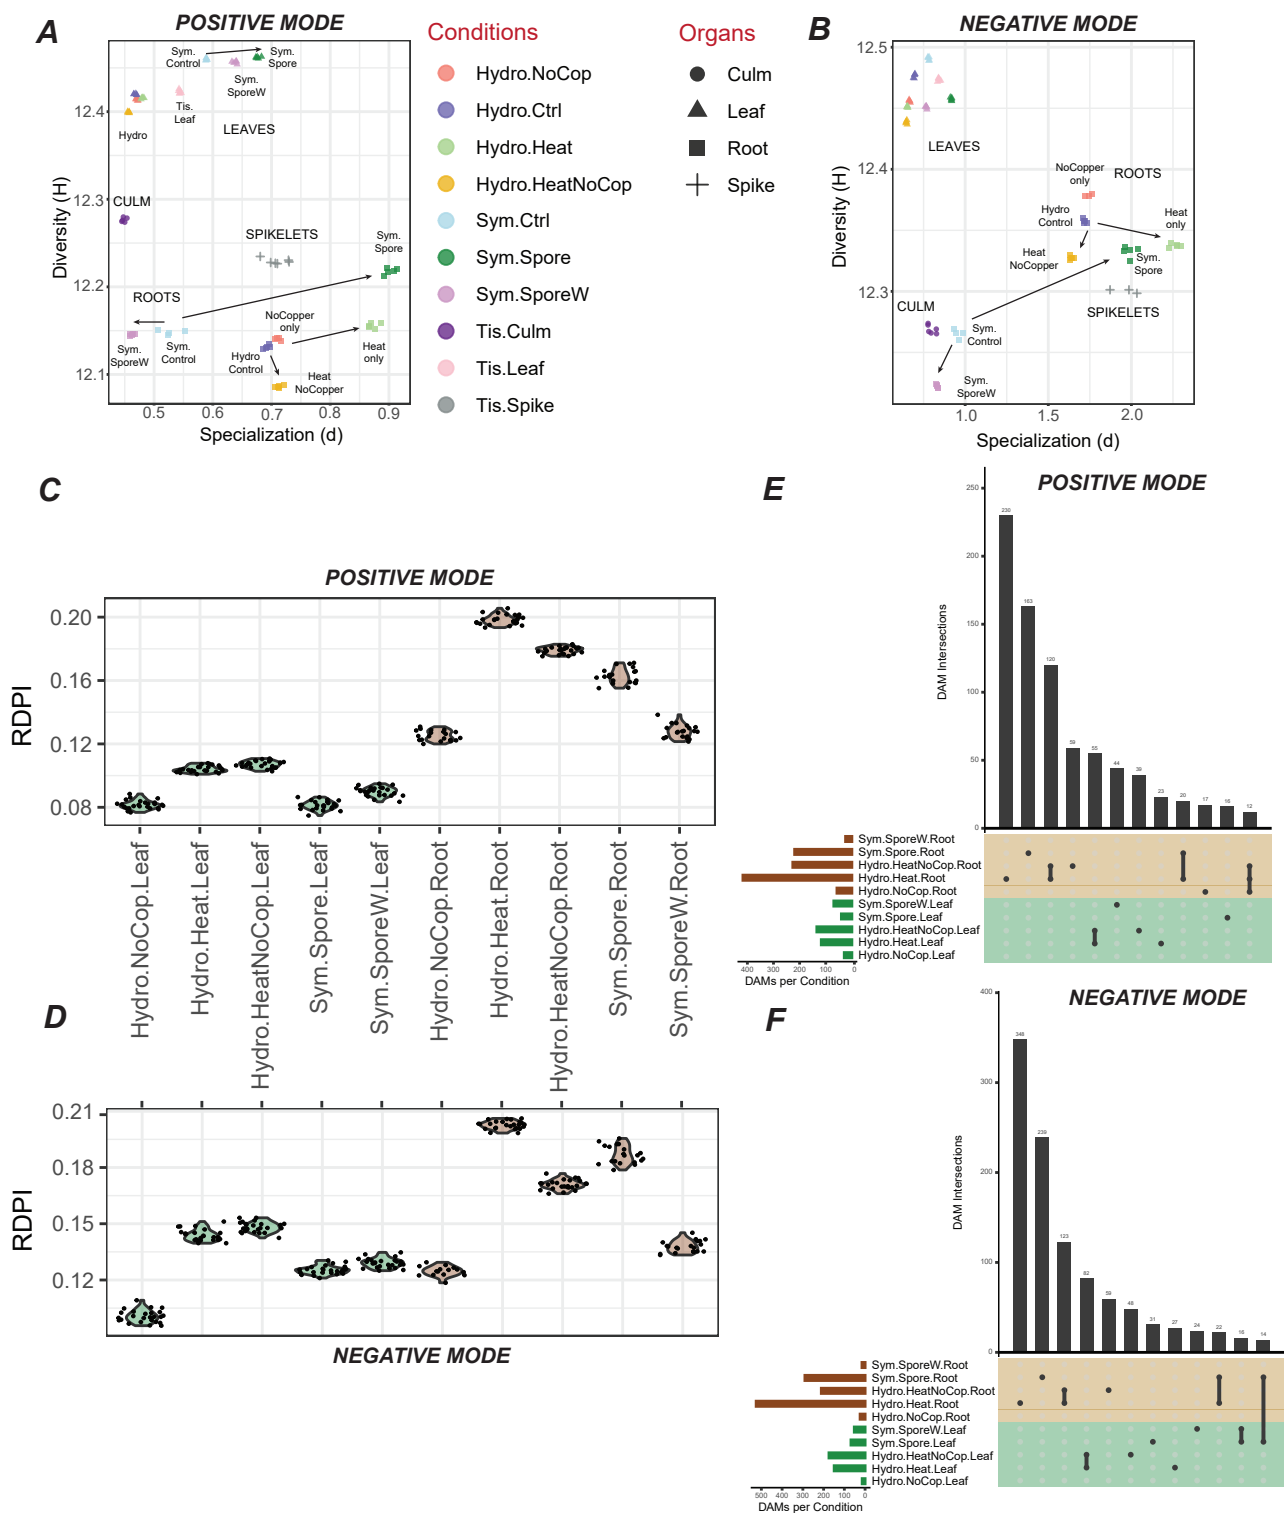

**Figure 2: Comparison of metabolomic perturbations among conditions.** (A), (B) Diversity vs. Specialization per condition, with organs depicted as different shapes and conditions as different colors. Annotations are added onto these plots for ease of interpretation. (C), (D) RDPI per stress condition. (E), (F) Upset plots of Differentially Abundant Peaks (DAP) per stress condition, inclusive of up- and down-accumulated peaks. Intersections (vertical bars) depict the number of DAPs in common to sets of conditions. Only sets with at least 10 peaks are shown. (A), (C), (E) positive mode (B), (D), (F) negative mode.



### Figure 3

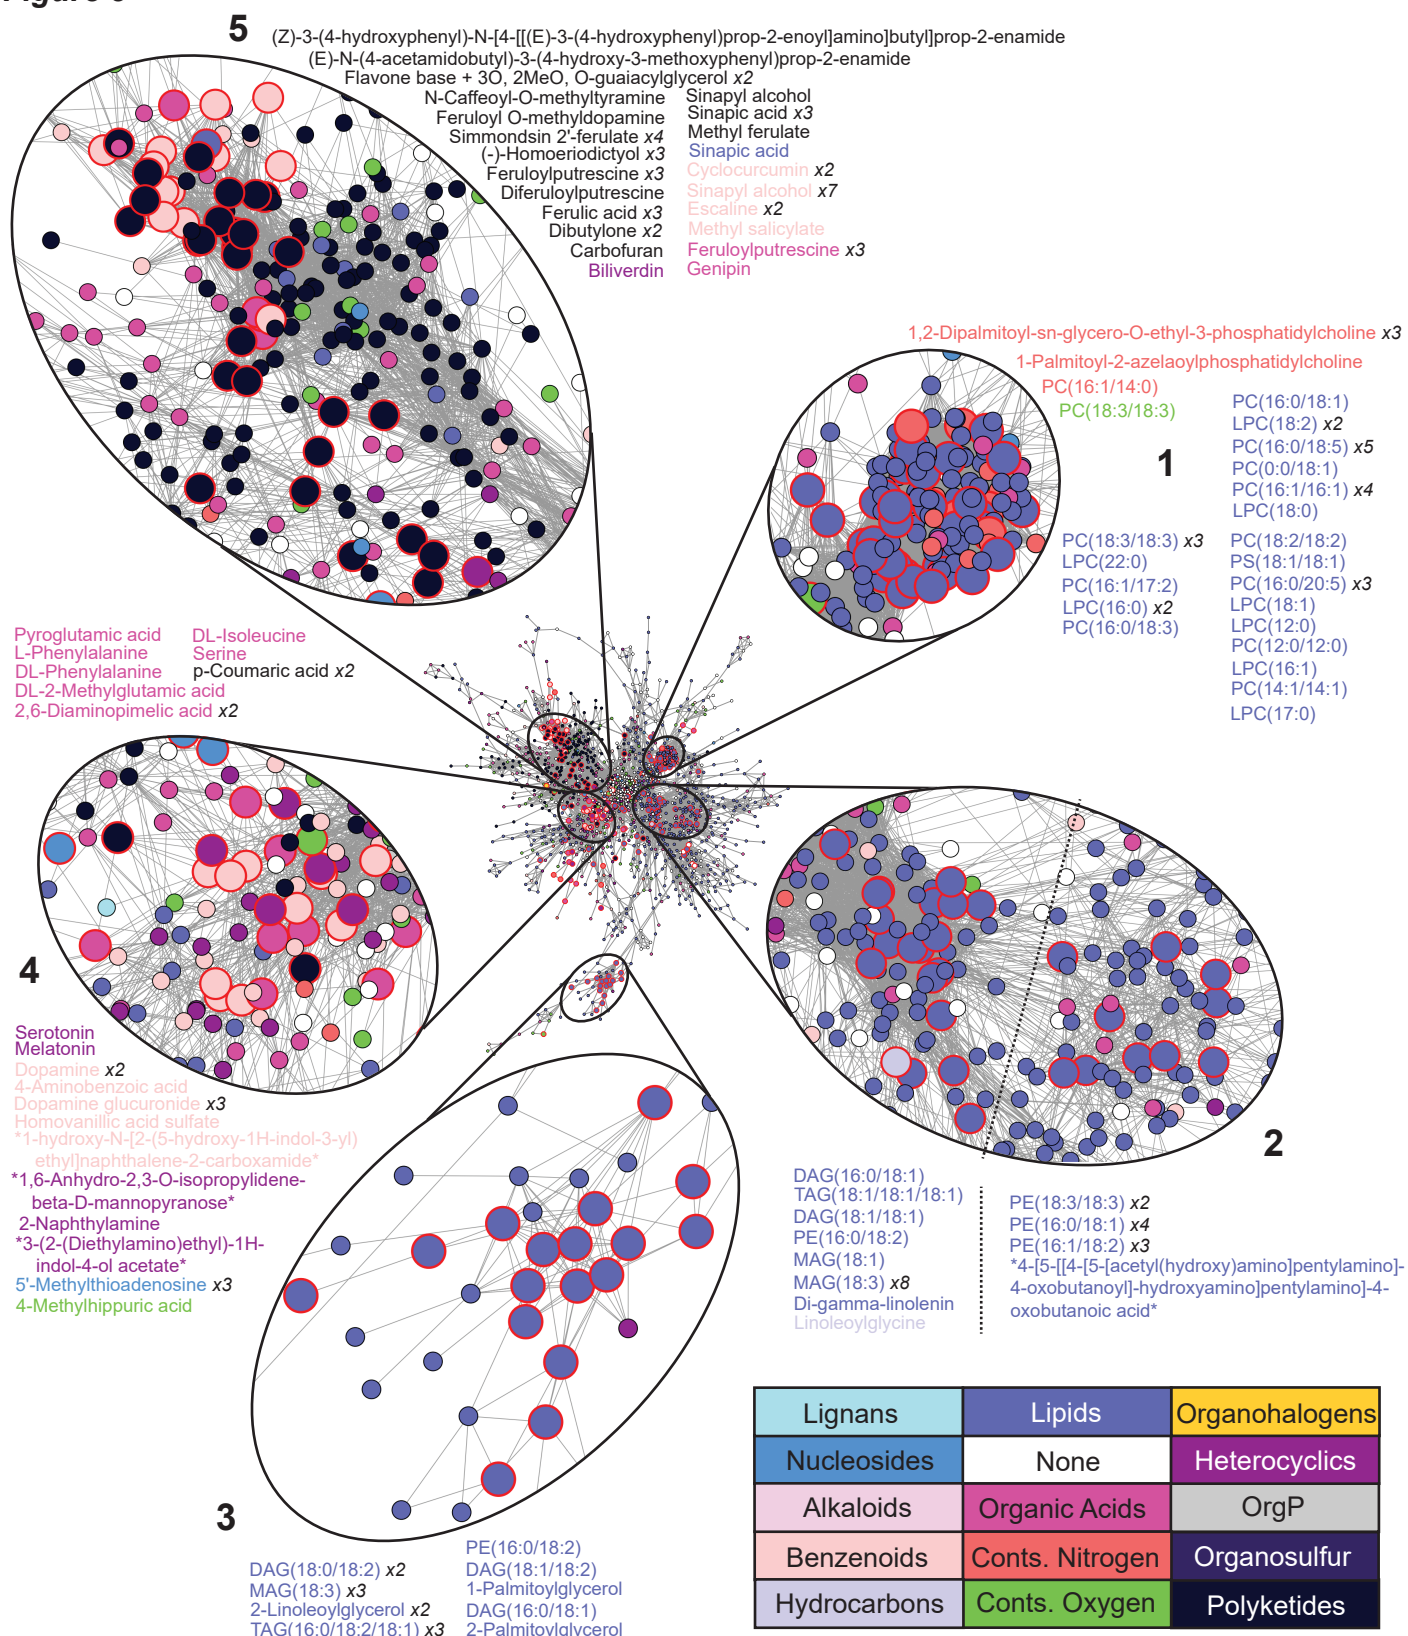

**Figure 3: Molecular Networking of peaks in positive mode.** Network nodes represent peaks detected in positive mode (in any condition/organ), and edges connect nodes that have a pairwise cosine score of >70. Large nodes with a red border signify identified peaks. Nodes and identifications (text) are colored with their CANOPUS-annotated Superclass. The number of times each identification occurs in a sub-network is indicated in italics. Asterisks (\*) denote an identification spanning multiple lines. The dashed line in subnetwork 2 separates the majority-Glycerolipid section of the subnetwork from the majority-Phosphoethanolamine section. PC = Phosphocholine, L = Lyso, DAG = Diacylglycerol, TAG = Triacylglycerol, PE = Phosphoethanolamine, MAG = Monoacylglycerol.

**Figure 4**

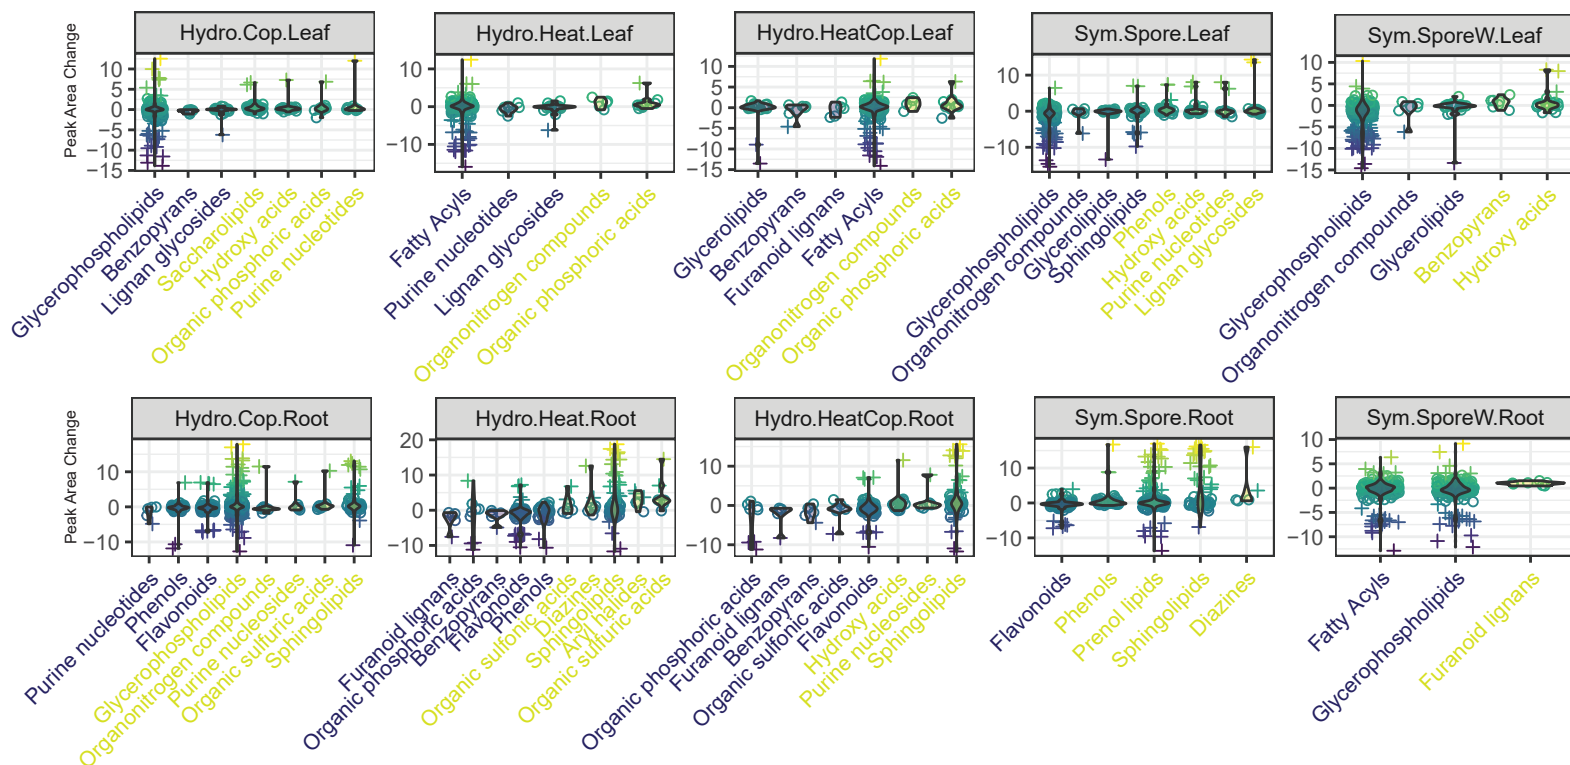

**Figure 4: Charting Stress-Induced Shifts of Molecular Classes, Negative Mode.** (A)

Abundance changes of peaks in response to stress. Each stress depicts Classes that were the most accumulated (Class name in yellow) or diminished (Class name in purple), on average. For a Class to be plotted, its average value must be greater than the 70th percentile or lower than the 30th percentile of all stress-induced peak area changes. Individual metabolites are plotted as circles, outliers are shown as +.

**Figure 5**

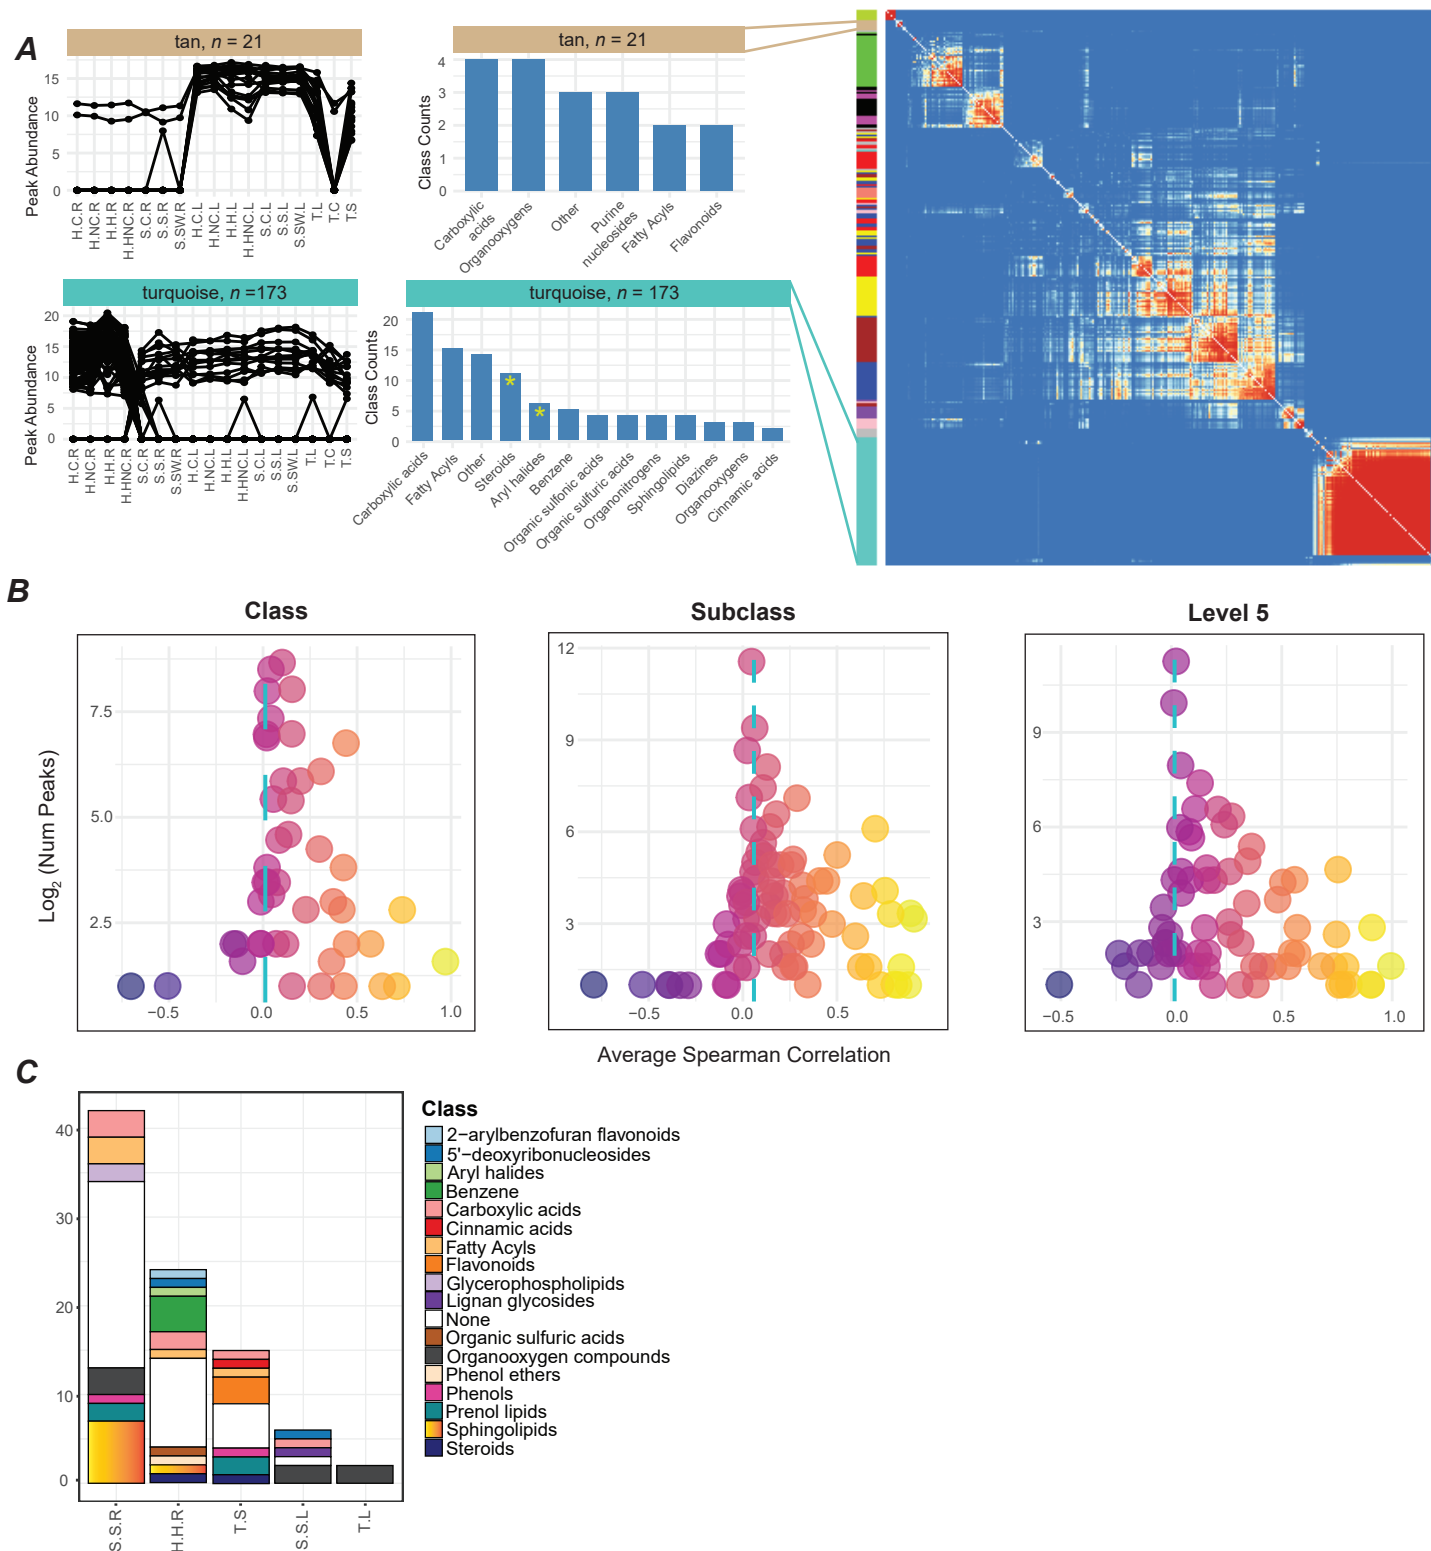

Flavonoids

## Brachypodium Metabolite eFP Browser

Figure 6

Positive Mode

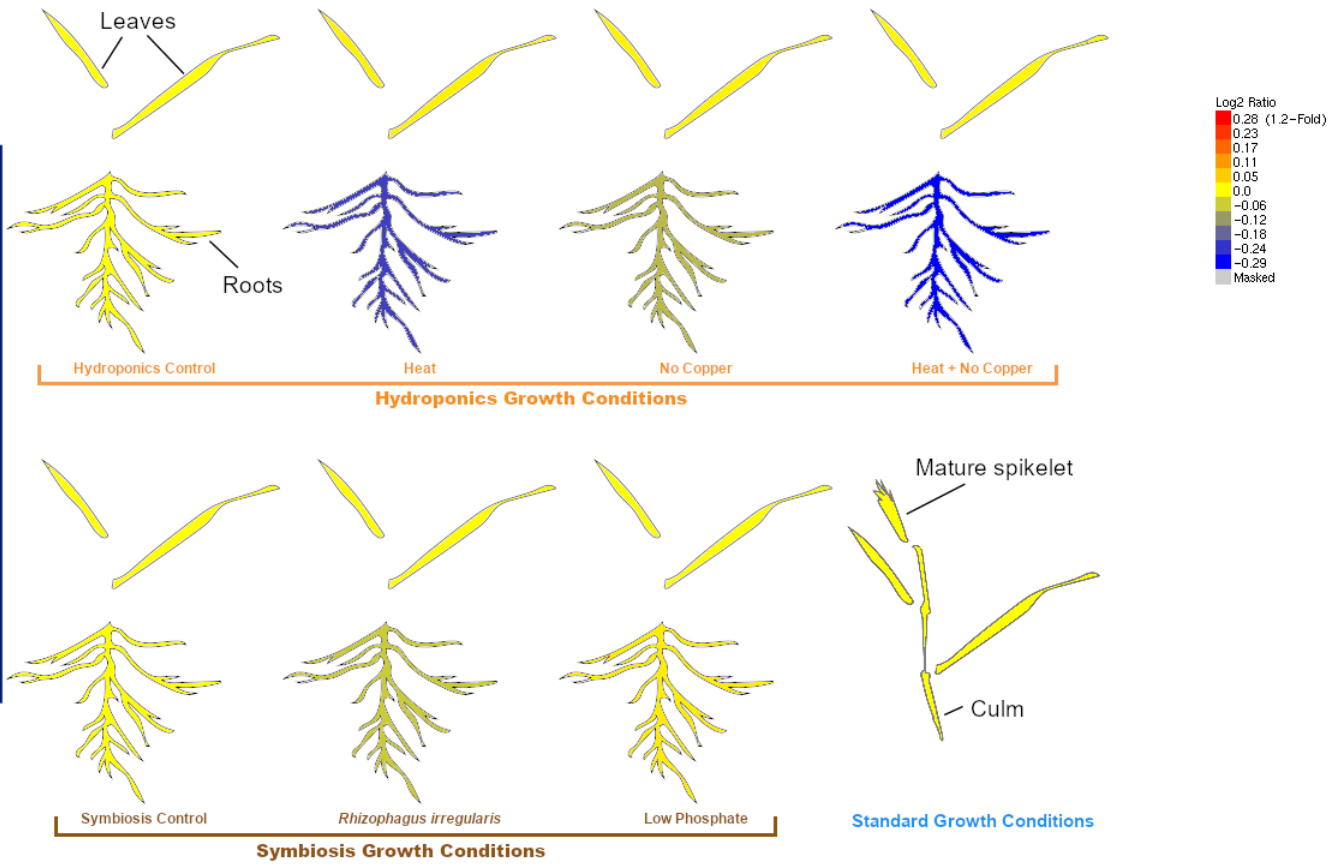

Negative Mode

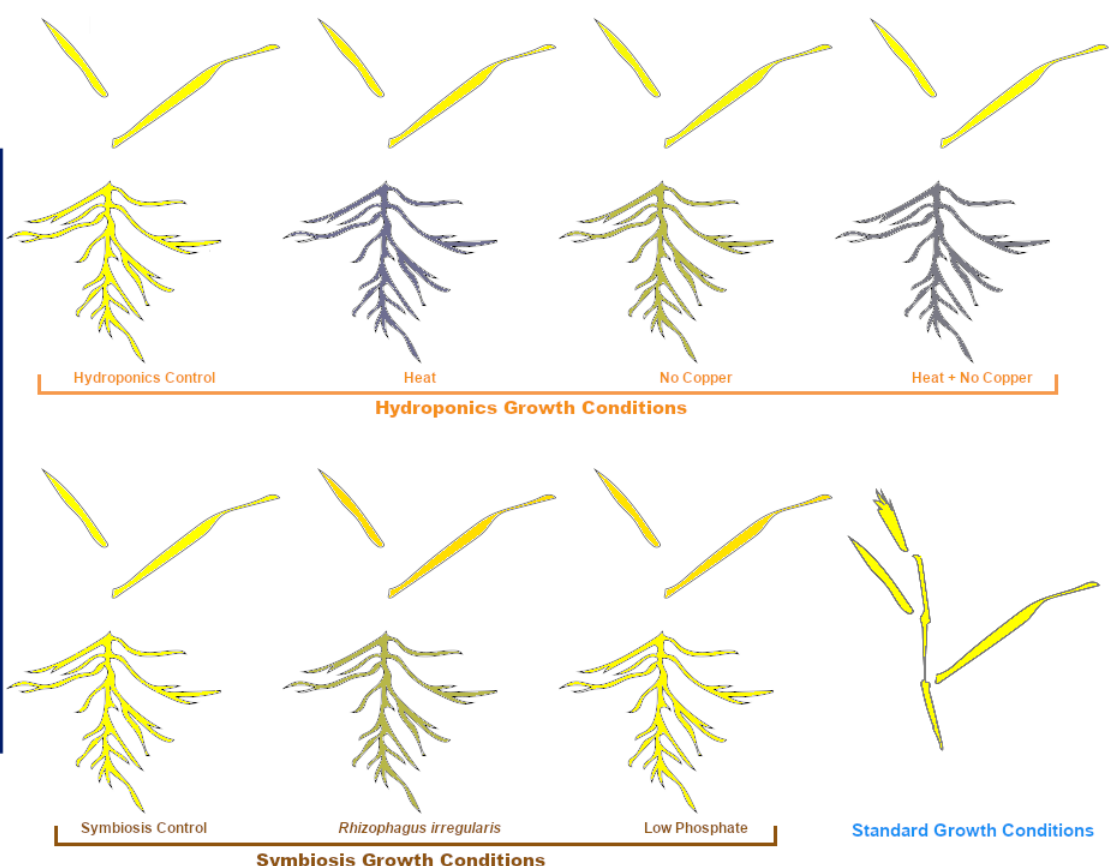

**Figure 6: Visualizing Stress-induced Changes in Class Abundance.** In Relative mode of the eFP browser (shown here for Flavonoids), the Log<sub>2</sub> Fold Changes in average Class abundance are plotted between a condition and its control. The consistent decreases among stressed roots are again seen.
